# Supplementary material for: Risk factors affecting inhospital mortality after hip fracture: retrospective analysis using the Japanese Diagnosis Procedure Combination Database
Source: PubMed Central journal article supplement — BMJ Open. 2012 May 4;2(3):e000416. doi: 10.1136/bmjopen-2011-000416 (PMC3346946; doi:10.1136/bmjopen-2011-000416), 2012-05-04
Supplement: bmjopen-2011-000416.draft_revisions.pdf [file bmjopen-2011-000416.draft_revisions.pdf]

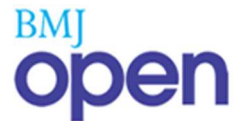

**Surgical treatment reduces in-hospital mortality after hip fracture: retrospective analysis using the Japanese Diagnosis Procedure Combination database**

|                                 |                                                                                                                                                                                                                                                                                                                                                                                                                                                                                                                                                                                                                   |
|---------------------------------|-------------------------------------------------------------------------------------------------------------------------------------------------------------------------------------------------------------------------------------------------------------------------------------------------------------------------------------------------------------------------------------------------------------------------------------------------------------------------------------------------------------------------------------------------------------------------------------------------------------------|
| Journal:                        | <i>BMJ Open</i>                                                                                                                                                                                                                                                                                                                                                                                                                                                                                                                                                                                                   |
| Manuscript ID:                  | bmjopen-2011-000416                                                                                                                                                                                                                                                                                                                                                                                                                                                                                                                                                                                               |
| Article Type:                   | Research                                                                                                                                                                                                                                                                                                                                                                                                                                                                                                                                                                                                          |
| Date Submitted by the Author:   | 16-Jan-2012                                                                                                                                                                                                                                                                                                                                                                                                                                                                                                                                                                                                       |
| Complete List of Authors:       | Shoda, Naoko; The University of Tokyo, Department of Orthopaedic Surgery<br>Yasunaga, Hideo; Graduate School of Medicine University of Tokyo,<br>Department of Health Management and Policy<br>Horiguchi, Hiromasa; Graduate School of Medicine University of Tokyo,<br>Department of Health Management and Policy<br>Matsuda, Shinya; University of Occupational and Environmental Health,<br>Department of Preventive Medicine and Community Health<br>Kadono, Yuho; The University of Tokyo, Department of Orthopaedic Surgery<br>Tanaka, Sakae; The University of Tokyo, Department of Orthopaedic<br>Surgery |
| <b>Primary Subject Heading</b>: | Complementary medicine                                                                                                                                                                                                                                                                                                                                                                                                                                                                                                                                                                                            |
| Secondary Subject Heading:      | Dentistry and oral medicine                                                                                                                                                                                                                                                                                                                                                                                                                                                                                                                                                                                       |
| Keywords:                       | ALTITUDE MEDICINE, Anaesthesia in cardiology < ANAESTHETICS,<br>Anaesthesia in oncology < ANAESTHETICS                                                                                                                                                                                                                                                                                                                                                                                                                                                                                                            |
|                                 |                                                                                                                                                                                                                                                                                                                                                                                                                                                                                                                                                                                                                   |

SCHOLARONE™  
Manuscripts

1 Shoda et al.

2  
3  
4  
5  
6  
7 **Surgical treatment reduces in-hospital mortality after hip fracture: retrospective**

8  
9 **analysis using the Japanese Diagnosis Procedure Combination database**

10  
11  
12  
13  
14  
15 Naoko Shoda, researcher<sup>1</sup> Hideo Yasunaga, associate professor<sup>2</sup> Hiromasa Horiguchi,  
16  
17  
18 lecturer<sup>2</sup> Yuho Kadono, assistant professor<sup>1</sup> Shinya Matsuda, professor<sup>3</sup> Sakae Tanaka,  
19  
20  
21 associate professor<sup>1</sup>

22  
23  
24  
25  
26  
27 <sup>1</sup> Department of Orthopaedic Surgery, Graduate School of Medicine, The University of

28  
29  
30  
31  
32 Tokyo, 7-3-1 Hongo, Bunkyo-ku, Tokyo 113-0033, Japan

33  
34  
35 <sup>2</sup> Department of Health Management and Policy, Graduate School of Medicine, The

36  
37  
38  
39  
40  
41  
42 University of Tokyo, 7-3-1 Hongo, Bunkyo-ku, Tokyo 113-0033, Japan

43  
44  
45 <sup>3</sup> Department of Preventive Medicine and Community Health, University of

46  
47  
48  
49  
50  
51  
52 Occupational and Environmental Health, 1-1 Iseigaoka, Yahatanishi-ku, Kitakyushu,

53  
54  
55  
56  
57  
58  
59  
60 Japan

**Correspondence to:** S Tanaka, Department of Orthopaedic Surgery, Faculty of

Medicine, The University of Tokyo, 7-3-1 Hongo, Bunkyo-ku, Tokyo 113-0033, Japan

Tel: +81-3-3815-5415 ext 33376; Fax: +81-3-3818-4082

[TANAKAS-ORT@h.u-tokyo.ac.jp](mailto:TANAKAS-ORT@h.u-tokyo.ac.jp)

Shoda et al.

## Abstract

**Objective:** To identify risk factors for in-hospital mortality in patients with hip fractures using the Japanese Diagnosis Procedure Combination (DPC) nationwide administrative claims database.

**Design:** Retrospective observational study.

**Setting:** Hospitals adopting the DPC system during 2007–2009.

**Participants:** We extracted a total of 80,800 eligible patients aged  $\geq 60$  years old with a single hip fracture (ICD-10 codes: S72.0 and S72.1). The DPC database includes patients treated between July and December each year.

**Main outcome measures:** In-hospital mortality after hip fracture.

**Results:** The overall in-hospital mortality rate after hip fractures was 3.3%. Multivariate analysis indicated that in-hospital mortality was significantly associated with male gender (odds ratio [OR] 2.12; 95% confidence interval [CI] 1.94 to 2.31), advancing age and number of comorbidities. Significantly higher mortality was observed in those treated conservatively (OR 4.25; 95% CI 3.92 to 4.61). Surgical delays of 5 days or more were significantly associated with higher rates of in-hospital mortality (OR 1.34; 95% CI 1.20 to 1.50).

**Conclusions:** In patients with hip fractures, surgical treatment was associated with

Shoda et al.

lower rates of in-hospital mortality.

What is already known on this topic

Hip fracture is a serious problem in an aging society and associated with high mortality.

Previous studies have shown several factors that may be associated with the increased mortality after hip fracture.

What this study adds

In-hospital mortality was significantly associated with male gender, advancing age and number of comorbidities. Significantly higher mortality was observed in those treated conservatively. Surgical delays of 5 days or more were significantly associated with higher rates of in-hospital mortality.

Shoda et al.

## INTRODUCTION

Hip fracture is a serious injury related to bone fragility caused by osteoporosis, and it has emerged as a public health burden in an aging society such as that of Japan.<sup>1-5</sup> It is estimated that the number of hip fractures worldwide will rise from 1.7 million in 1990 to 6.3 million in 2050.<sup>6</sup> Recent studies have reported an increased incidence of hip fractures in Japan<sup>3 5</sup> although the incidence is decreasing in some Western countries.<sup>7 8</sup> Hip fracture leads to impaired function, loss of independence and increased mortality of the patients. It has been reported that the increased mortality after hip fracture is associated with many factors such as increasing age, comorbidity and pre-fracture functional disability of the patients.<sup>9-12</sup> Hip fractures are usually treated by orthopaedic surgical procedures such as hemiarthroplasty or internal fixation, and several studies have shown that early surgery is associated with lower rates of mortality,<sup>13-16</sup> while other studies exhibited no benefit of early surgery in reducing mortality or improving functional recovery.<sup>17 18</sup> Conservative treatment is often chosen for patients with severe comorbidities. However, it is not clear whether conservative treatment is actually superior in reducing mortality compared with surgical treatment in high risk patients. In this study, we investigated the in-hospital mortality rate of hip fracture patients using data from the Japanese Diagnosis Procedure Combination (DPC) nationwide

1 Shoda et al.

2  
3  
4  
5  
6 administrative claims database, and compared mortality following hip fractures between  
7  
8  
9 groups treated surgically or conservatively.  
10  
11  
12  
13  
14

## 15 **METHODS**

### 16 **DPC database**

17  
18  
19  
20 The DPC database is a diagnosis-dominant case-mix system administered by the  
21  
22  
23  
24 Ministry of Health, Labour and Welfare of Japan, and linked with a lump-sum payment  
25  
26  
27  
28 system.<sup>19</sup> All 82 university teaching hospitals in Japan are obliged to adopt the DPC  
29  
30  
31  
32 system, while adoption by community hospitals is voluntary. A comprehensive survey  
33  
34  
35  
36 of the DPC hospitals is conducted between July 1 and December 31 each year by the  
37  
38  
39  
40 DPC Research Group, funded by the Japanese government. Detailed patient data, as  
41  
42  
43  
44 well as administrative claims data, are collected for all the inpatients discharged from  
45  
46  
47  
48 the participating hospitals between July 1 and December 31 each year. The number of  
49  
50  
51  
52 participating hospitals increased to 818 with 2.57 million patients in 2009, which  
53  
54  
55  
56 represented approximately 40% of all the in-patient admissions to acute care hospitals  
57  
58  
59  
60 in Japan. Hospitals send all the anonymised data for each month to the DPC Research  
Group for compilation in the database server in the Department of Health Management  
and Policy, The University of Tokyo.

Shoda et al.

The database includes the following data: hospital location; patients' age and sex; diagnoses, comorbidities at admission, and complications after admission, recorded in accordance with the International Classification of Diseases, 10th Revision (ICD-10) codes and text data in the Japanese language; procedures coded with the Japanese original K codes; comorbidities at admission; complications after admission coded with the ICD-10 codes; in-hospital mortality; length of stay; and hospital charges.

This study was based on a secondary analysis of the administrative claims data. The requirement for informed consent was waived because of the anonymous nature of the data. Study approval was obtained from the Institutional Review Board at the University of Occupational and Environmental Health.

### Data compilation

We retrospectively collected data of patients coded S72.0 (fracture of the neck of the femur) and S72.1 (perthrochanteric fracture) between 2007 and 2009 from the DPC database. Exclusion criteria were as follows: age < 60 years; patients with open fractures or multiple fractures; and incomplete data. We extracted data on age, sex, method of treatment (surgical or conservative), number of acute beds and in-hospital mortality. From the comorbidities at admission, we collected data on seven factors:

Shoda et al.

malignancy, diabetes mellitus, cardiovascular disease, cerebrovascular disease, lung disease, renal failure, hepatic failure.

### Statistical analysis

The Chi-squared test was used for univariate comparisons of the surgical and conservative treatment groups. Multivariate logistic regression analysis was performed to analyse the confounding effects of various factors on in-hospital mortality. Odds ratios (OR) and 95% confidence intervals (CI) were determined. The OR of in-hospital mortality in conservatively treated patients was analysed in subgroups of patients stratified according to number of comorbidities or age. In addition, the effect of surgical delays in surgically treated patients was analysed. A p-value <0.05 was considered significant. All the statistical analyses were performed using SPSS Statistics ver. 19.0 (IBM SPSS Inc.; Chicago, IL, US).

## RESULTS

### Patient background

Data of 94,139 patients with hip fractures were extracted based on ICD-10 codes. We excluded 8,956 patients with open fractures or multiple fractures, 496 patients with



Shoda et al.

incomplete data and 3887 patients aged <60 years. Finally, 80,800 eligible patients were included in the analysis.

Table 1 presents the patient characteristics. Overall, 79.1% were females. The mean (standard deviation) age was 82.8 (8.3) years. The patients were categorised into the following four age groups: 60–69 (n=5,523), 70–79 (n=18,618), 80–89 (n=37,362), and  $\geq 90$  (n=19,297). Approximately 83% (n=66,893) of patients underwent surgical treatment, while 17% (n=13,907) were treated conservatively. Hospital size was categorised into four groups according to the number of acute beds:  $\leq 199$  (13.9%), 200–399 (40.4%), 400–599 (28.6%), and  $\geq 600$  (15.0%). The proportion of patients with comorbidities at admission was as follows: malignancy (5.7%), diabetes mellitus (13.4%), cardiovascular disease (7.6%), cerebrovascular disease (8.0%), lung disease (6.4%), renal failure (4.4%) and hepatic failure (0.8%).

### Univariate analysis of in-hospital mortality

Table 2 shows the factors associated with in-hospital mortality according to the univariate analysis. The overall in-hospital mortality rate was 3.3% (n=2,681) with the average length of stay of 38 days. Male gender, advancing age, conservative treatment and smaller hospital size were significantly associated with higher mortality. As for

Shoda et al.

comorbidities, patients with malignancy, lung disease, renal failure and hepatic failure at admission exhibited higher mortality rates. In contrast, diabetes mellitus, cardiovascular disease or cerebrovascular disease did not significantly affect the mortality of the patients. The number of comorbidities at admission was positively related to the mortality rate.

### **Multivariate analysis of in-hospital mortality**

Table 3 shows the adjusted OR and 95% CI for in-hospital mortality as determined by multivariate analysis. Consistent with the univariate analysis, the in-hospital mortality was significantly associated with male gender (OR 2.12 compared with female gender;  $p < 0.001$ ), advancing age (OR 1.57 in the 70–79 years age group, 2.28 in the 80–89 years group and 3.51 in the  $\geq 90$  years group compared with the 60–69 years age group,  $p < 0.001$ ), conservative treatment (OR 4.25 compared with the surgical treatment group,  $p < 0.001$ ), and number of comorbidities (OR 2.50 in patients with one comorbidity and 3.79 in those with two or more comorbidities as compared with no comorbidity,  $p < 0.001$ ). There was no association with hospital size. We then stratified the patients into the following three groups according to the number of comorbidities: no comorbidity ( $n=51,544$ ), one comorbidity ( $n=22,170$ ), and two or more comorbidities

1 Shoda et al.

2  
3  
4  
5  
6 (n=7,086). Regardless of the number of comorbidities, conservative treatment was  
7  
8  
9 significantly associated with higher mortality compared with surgical treatment (fig 1A).  
10  
11  
12 In addition, patients with conservative treatment exhibited higher mortality even the  
13  
14  
15 patients were stratified according to age (fig 1B).  
16  
17

18 We finally analysed the effect of surgical delays on in-hospital mortality in patients  
19  
20  
21 treated surgically. Delays to surgery of 5 days or longer after admission were  
22  
23  
24 significantly associated with a higher rate of in-hospital mortality (OR 1.34; 95% CI  
25  
26  
27 1.20 to 1.50), while there was no significant difference in mortality among patients  
28  
29  
30 undergoing surgery within 4 days.  
31  
32

### 33 34 35 **DISCUSSION**

36  
37  
38 Previous studies have reported that 3.6% to 6.0% of patients with hip fractures die  
39  
40  
41 during hospitalisation,<sup>9 20</sup> and that the 1-year mortality rate is between 10.1% and  
42  
43  
44 27.3%.<sup>12 21</sup> The reasons for the high mortality rate after hip fracture have been  
45  
46  
47 extensively studied. Frost et al. recently reported that men had a 2.4 times higher risk of  
48  
49  
50 in-hospital death compared with women, and advancing age increased the risk by 2.06  
51  
52  
53 times for every 10-year increase in age.<sup>9</sup> Maggi et al. reported that 6-month mortality  
54  
55  
56 was positively associated with increasing age, comorbidity, pre-fracture functional  
57  
58  
59  
60

Shoda et al.

disability and having surgery more than 48 hours after admission.<sup>22</sup> Hu et al. identified the following 12 preoperative predictors of postoperative mortality in hip fracture patients through systematic review: advanced age, male gender, nursing home or facility residence, poor preoperative walking capacity, poor activities of daily living, higher ASA (American Society of Anesthesiologists) grading, poor mental state, multiple comorbidities, dementia or cognitive impairment, diabetes, cancer and cardiac disease.<sup>10</sup>

In this study, we investigated the in-hospital mortality rate after hip fractures using the Japanese DPC administrative claims database. The DPC database is equivalent in several ways to the Nationwide Inpatient Sample database in the United States, but there is an advantage of the DPC database whereby complications occurring after admission are clearly differentiated with comorbidities that were already present at admission.

In our study, 83% of the patients underwent surgery and 17% were treated conservatively, which were similar rates to previous studies. Among them, 3.3% of patients died during the hospitalisation. The overall mortality rate was slightly lower than that in previous reports. In multivariate analysis, we found that male gender, advancing age and number of comorbidities were positively and independently associated with the mortality, which is consistent with previous studies. The size of hospital as determined by the number of acute beds had no significant relationship with

1 Shoda et al.

2  
3  
4  
5  
6 in-hospital mortality in our study. This result may suggest that high risk patients are not  
7  
8  
9 necessarily treated at large hospitals. Schilling et al. reported that decreased  
10  
11  
12 hospital-wide nurse staffing levels are associated with increased in-hospital mortality  
13  
14  
15 among patients with hip fracture.<sup>20</sup> In contrast, Browne et al. reported that hospital  
16  
17  
18 volume is not associated with decreased mortality in the treatment of hip fractures.<sup>23</sup>  
19  
20  
21 There are various scales to represent hospital quality, so more studies may be needed to  
22  
23  
24 clarify the relationship between hospital quality and hip fracture mortality.  
25  
26

27 Interestingly, conservative treatment was an independent risk factor for in-hospital  
28  
29 mortality. The analysis indicated that this did not arise because of patients with higher  
30  
31  
32 risks being more likely to undergo conservative treatment, because patients treated  
33  
34  
35 conservatively exhibited more than four times higher risk for mortality even after  
36  
37  
38 stratification according to the number of comorbidities or age. The exact reason for the  
39  
40  
41 higher mortality in conservatively treated patients is unclear, but the patients treated  
42  
43  
44 surgically can start rehabilitation earlier, and therefore avoid the complications caused  
45  
46  
47 by long-term bed rest such as bedsores, venous thromboembolism, atelectasis and  
48  
49  
50 hypostatic pneumonia.  
51  
52  
53

54 We found that surgical delays of 5 days or more were significantly associated with  
55  
56  
57 higher rates of in-hospital mortality, which was consistent with the recent prospective  
58  
59  
60

1 Shoda et al.

2  
3  
4  
5  
6 cohort study by Vidan et al., showing that surgical delays longer than 5 days were

7  
8  
9 associated with higher mortality and medical complication rates.<sup>15</sup>

10  
11  
12 Our study has several limitations. First, this is a retrospective observational study.

13  
14  
15 Thus, patient allocation was non-randomised and the cohort of patients we used did not

16  
17  
18 constitute random sampling. Consequently, our results are potentially biased due to

19  
20  
21 unmeasured confounders. Second, the DPC adopting hospitals are generally of large

22  
23  
24 size although the DPC database covered more than 40% of all inpatient admissions in

25  
26  
27 Japan. Third, this database is for administrative claims, so recorded diagnoses may be

28  
29  
30 less well validated than in planned prospective surveys. Finally, this database includes

31  
32  
33 information only during the hospitalisation, and we were unable to determine the

34  
35  
36 condition of patients before admission or after discharge. Despite these limitations, our

37  
38  
39 study provides helpful information about the risk factors of in-hospital mortality for

40  
41  
42 treatment decision-making in patients with hip fractures.

## 43 44 45 46 47 **CONCLUSION**

48  
49  
50 This study has shown that timely surgical treatment in patients with hip fractures was

51  
52  
53 associated with lower rates of in-hospital mortality.

1 Shoda et al.  
2  
3  
4  
5  
6  
7

## 8 **Acknowledgement**

9 **Contributors:** NS, HY, HH and ST designed the study, analysed and interpreted the  
10 data, and drafted the manuscript. YK contributed to the study design, analysis and  
11 interpretation of the data. SM interpreted the data and made significant contributions to  
12 drafts of the manuscript. All authors had full access to all data (including statistical  
13 reports and tables) in the study and take responsibility for the integrity of the data and  
14 the accuracy of the data analysis. SN, HY and ST are guarantors.  
15  
16  
17  
18  
19  
20  
21  
22  
23  
24  
25  
26  
27

28 **Funding:** This study was supported in part by Grants-in-Aid for Research on Policy  
29 Planning and Evaluation from the Ministry of Health, Labour and Welfare, Japan; the  
30 Funding Program for World-Leading Innovative R&D on Science and Technology  
31 (FIRST program) from the Council for Science and Technology Policy, Japan; and a  
32 research grant from Japan Osteoporosis Foundation. The funding source was not  
33 involved in the design, conduct or interpretation of the study, or in the writing of the  
34 submitted work.  
35  
36  
37  
38  
39  
40  
41  
42  
43  
44  
45  
46  
47  
48  
49

50 **Competing interests:** None declared.  
51  
52

53 **Ethical approval:** Not needed  
54  
55  
56  
57  
58  
59  
60

Shoda et al.

## References

1. Gullberg B, Johnell O, Kanis JA. World-wide projections for hip fracture. *Osteoporosis international : a journal established as result of cooperation between the European Foundation for Osteoporosis and the National Osteoporosis Foundation of the USA* 1997;7(5):407-13.
2. Hagino H, Furukawa K, Fujiwara S, Okano T, Katagiri H, Yamamoto K, et al. Recent trends in the incidence and lifetime risk of hip fracture in Tottori, Japan. *Osteoporosis international : a journal established as result of cooperation between the European Foundation for Osteoporosis and the National Osteoporosis Foundation of the USA* 2009;20(4):543-8.
3. Hagino H, Sakamoto K, Harada A, Nakamura T, Mutoh Y, Mori S, et al. Nationwide one-decade survey of hip fractures in Japan. *Journal of orthopaedic science : official journal of the Japanese Orthopaedic Association* 2010;15(6):737-45.
4. Johnell O, Kanis JA. An estimate of the worldwide prevalence, mortality and disability associated with hip fracture. *Osteoporosis international : a journal established as result of cooperation between the European Foundation for Osteoporosis and the National Osteoporosis Foundation of the USA* 2004;15(11):897-902.
5. Orimo H, Yaegashi Y, Onoda T, Fukushima Y, Hosoi T, Sakata K. Hip fracture incidence in Japan: estimates of new patients in 2007 and 20-year trends. *Arch Osteoporos* 2009;4(1-2):71-77.
6. Sambrook P, Cooper C. Osteoporosis. *Lancet* 2006;367(9527):2010-8.
7. Abrahamsen B, Vestergaard P. Declining incidence of hip fractures and the extent of use of anti-osteoporotic therapy in Denmark 1997-2006. *Osteoporosis international : a journal established as result of cooperation between the European Foundation for Osteoporosis and the National Osteoporosis Foundation of the USA* 2010;21(3):373-80.
8. Leslie WD, O'Donnell S, Jean S, Lagace C, Walsh P, Bancej C, et al. Trends in hip fracture rates in Canada. *JAMA : the journal of the American Medical Association* 2009;302(8):883-9.
9. Frost SA, Nguyen ND, Black DA, Eisman JA, Nguyen TV. Risk factors for in-hospital post-hip fracture mortality. *Bone* 2011;49(3):553-8.
10. Hu F, Jiang C, Shen J, Tang P, Wang Y. Preoperative predictors for mortality following hip fracture surgery: A systematic review and meta-analysis. *Injury* 2011.
11. Meyer HE, Tverdal A, Falch JA, Pedersen JI. Factors associated with mortality after hip fracture. *Osteoporosis international : a journal established as result of cooperation*



Shoda et al.

- between the European Foundation for Osteoporosis and the National Osteoporosis Foundation of the USA 2000;11(3):228-32.
12. Panula J, Pihlajamaki H, Mattila VM, Jaatinen P, Vahlberg T, Aarnio P, et al. Mortality and cause of death in hip fracture patients aged 65 or older: a population-based study. *BMC Musculoskelet Disord* 2011;12:105.
  13. Bottle A, Aylin P. Mortality associated with delay in operation after hip fracture: observational study. *BMJ* 2006;332(7547):947-51.
  14. Gdalevich M, Cohen D, Yosef D, Tauber C. Morbidity and mortality after hip fracture: the impact of operative delay. *Archives of orthopaedic and trauma surgery* 2004;124(5):334-40.
  15. Vidan MT, Sanchez E, Gracia Y, Maranon E, Vaquero J, Serra JA. Causes and effects of surgical delay in patients with hip fracture: a cohort study. *Annals of internal medicine* 2011;155(4):226-33.
  16. Simunovic N, Devereaux PJ, Sprague S, Guyatt GH, Schemitsch E, Debeer J, et al. Effect of early surgery after hip fracture on mortality and complications: systematic review and meta-analysis. *CMAJ : Canadian Medical Association journal = journal de l'Association medicale canadienne* 2010;182(15):1609-16.
  17. Orosz GM, Magaziner J, Hannan EL, Morrison RS, Koval K, Gilbert M, et al. Association of timing of surgery for hip fracture and patient outcomes. *JAMA : the journal of the American Medical Association* 2004;291(14):1738-43.
  18. Siegmeth AW, Gurusamy K, Parker MJ. Delay to surgery prolongs hospital stay in patients with fractures of the proximal femur. *The Journal of bone and joint surgery. British volume* 2005;87(8):1123-6.
  19. Matsuda S, Ishikawa KB, Kuwabara K, Fujimori K, Fushimi K, Hashimoto H. Development and use of the Japanese case-mix system. *Eurohealth* 2009;14(3):25-30.
  20. Schilling P, Goulet JA, Dougherty PJ. Do Higher Hospital-wide Nurse Staffing Levels Reduce In-hospital Mortality in Elderly Patients with Hip Fractures: A Pilot Study. *Clin Orthop Relat Res* 2011.
  21. Sakamoto K, Nakamura T, Hagino H, Endo N, Mori S, Muto Y, et al. Report on the Japanese Orthopaedic Association's 3-year project observing hip fractures at fixed-point hospitals. *Journal of orthopaedic science : official journal of the Japanese Orthopaedic Association* 2006;11(2):127-34.
  22. Maggi S, Siviero P, Wetle T, Besdine RW, Saugo M, Crepaldi G. A multicenter survey on profile of care for hip fracture: predictors of mortality and disability. *Osteoporosis international : a journal established as result of cooperation between the European*

Shoda et al.

Foundation for Osteoporosis and the National Osteoporosis Foundation of the USA  
2010;21(2):223-31.

23. Browne JA, Pietrobon R, Olson SA. Hip fracture outcomes: does surgeon or hospital  
volume really matter? The Journal of trauma 2009;66(3):809-14.

Confidential Peer Review Only

1  
2  
3  
4  
5  
6  
7  
8  
9  
10  
11  
12  
13  
14  
15  
16  
17  
18  
19  
20  
21  
22  
23  
24  
25  
26  
27  
28  
29  
30  
31  
32  
33  
34  
35  
36  
37  
38  
39  
40  
41  
42  
43  
44  
45  
46  
47  
48  
49  
50  
51  
52  
53  
54  
55  
56  
57  
58  
59  
60

Shoda et al.

**Figure legends**

Table 1 Patient characteristics

Table 2 Risk factors for in-hospital mortality (univariate analysis)

Table 3 Risk factors for in-hospital mortality (multivariate analysis)

Fig 1 Odds ratios of in-hospital mortality and 95% confidence intervals in hip fracture patients treated conservatively. **A.** Patients were stratified into three groups according to the number of comorbidities. **B.** Patients were stratified into four groups according to age.

Shoda et al.

Table 1 Patient characteristics

|                                             | n      | (%)    |
|---------------------------------------------|--------|--------|
| <b>Gender</b>                               |        |        |
| Females                                     | 63,920 | (79.1) |
| Males                                       | 16,880 | (20.9) |
| <b>Age</b>                                  |        |        |
| 60–69                                       | 5,523  | (6.8)  |
| 70–79                                       | 18,618 | (23.0) |
| 80–89                                       | 37,362 | (46.2) |
| ≥90                                         | 19,297 | (23.9) |
| <b>Treatment</b>                            |        |        |
| Surgical                                    | 66,893 | (82.8) |
| Conservative                                | 13,907 | (17.2) |
| <b>Hospital size (number of acute beds)</b> |        |        |
| ≤199                                        | 11,243 | (13.9) |
| 200–399                                     | 32,613 | (40.4) |
| 400–599                                     | 23,125 | (28.6) |
| ≥600                                        | 12,099 | (15.0) |
| <b>Comorbidities</b>                        |        |        |
| Malignancy                                  | 4,753  | (5.7)  |
| Diabetes mellitus                           | 10,795 | (13.4) |
| Cardiovascular disease                      | 6,147  | (7.6)  |
| Cerebrovascular disease                     | 6,438  | (8.0)  |
| Lung disease                                | 5,179  | (6.4)  |
| Renal failure                               | 3,554  | (4.4)  |
| Hepatic failure                             | 646    | (0.8)  |
| <b>Number of comorbidities</b>              |        |        |
| 0                                           | 51,544 | (63.8) |
| 1                                           | 22,170 | (27.4) |
| ≥2                                          | 7,086  | (8.8)  |

Shoda et al.

Table 2 Risk factors for in-hospital mortality (univariate analysis)

|                                             | n    | (%)    | p-value |
|---------------------------------------------|------|--------|---------|
| <b>Total</b>                                | 2681 | (3.3)  |         |
| <b>Gender</b>                               |      |        |         |
| Females                                     | 1677 | (2.6)  | <0.001  |
| Males                                       | 1004 | (5.9)  |         |
| <b>Age</b>                                  |      |        |         |
| 60–69                                       | 97   | (1.8)  | <0.001  |
| 70–79                                       | 488  | (2.6)  |         |
| 80–89                                       | 1223 | (3.3)  |         |
| ≥90                                         | 873  | (4.5)  |         |
| <b>Treatment</b>                            |      |        |         |
| Surgical                                    | 1372 | (2.1)  | <0.001  |
| Conservative                                | 1309 | (9.4)  |         |
| <b>Hospital size (number of acute beds)</b> |      |        |         |
| ≤199                                        | 454  | (4.0)  | <0.001  |
| 200–399                                     | 1080 | (3.3)  |         |
| 400–599                                     | 672  | (2.9)  |         |
| ≥600                                        | 412  | (3.4)  |         |
| <b>Comorbidities</b>                        |      |        |         |
| Malignancy                                  | 669  | (14.6) | <0.001  |
| Diabetes mellitus                           | 365  | (3.4)  | 0.694   |
| Cardiovascular disease                      | 198  | (3.2)  | 0.659   |
| Cerebrovascular disease                     | 215  | (3.3)  | 0.920   |
| Lung disease                                | 516  | (10.0) | <0.001  |
| Renal failure                               | 305  | (8.6)  | <0.001  |
| Hepatic failure                             | 126  | (19.5) | <0.001  |
| <b>Number of comorbidities</b>              |      |        |         |
| 0                                           | 968  | (1.9)  | <0.001  |
| 1                                           | 1139 | (5.1)  |         |
| ≥2                                          | 574  | (8.1)  |         |

Shoda et al.

Table 3 Risk factors for in-hospital mortality (multivariate analysis)

|                                             |              | Odds ratio | 95% confidence interval | p-value |
|---------------------------------------------|--------------|------------|-------------------------|---------|
| <b>Gender</b>                               |              |            |                         |         |
|                                             | Females      | reference  |                         |         |
|                                             | Males        | 2.12       | 1.94 to 2.31            | <0.001  |
| <b>Age</b>                                  |              |            |                         |         |
|                                             | 60–69        | reference  |                         |         |
|                                             | 70–79        | 1.57       | 1.25 to 1.96            | <0.001  |
|                                             | 80–89        | 2.28       | 1.84 to 2.82            | <0.001  |
|                                             | ≥90          | 3.51       | 2.83 to 4.37            | <0.001  |
| <b>Treatment</b>                            |              |            |                         |         |
|                                             | Surgical     | reference  |                         |         |
|                                             | Conservative | 4.25       | 3.92 to 4.61            | <0.001  |
| <b>Hospital size (number of acute beds)</b> |              |            |                         |         |
|                                             | ≤199         | reference  |                         |         |
|                                             | 200–399      | 0.99       | 0.88 to 1.11            | 0.814   |
|                                             | 400–599      | 0.88       | 0.77 to 1.00            | 0.043   |
|                                             | ≥600         | 0.93       | 0.81 to 1.07            | 0.304   |
| <b>Number of comorbidities</b>              |              |            |                         |         |
|                                             | 0            | reference  |                         |         |
|                                             | 1            | 2.50       | 2.28 to 2.74            | <0.001  |
|                                             | ≥2           | 3.79       | 3.38 to 4.24            | <0.001  |

Shoda et al.

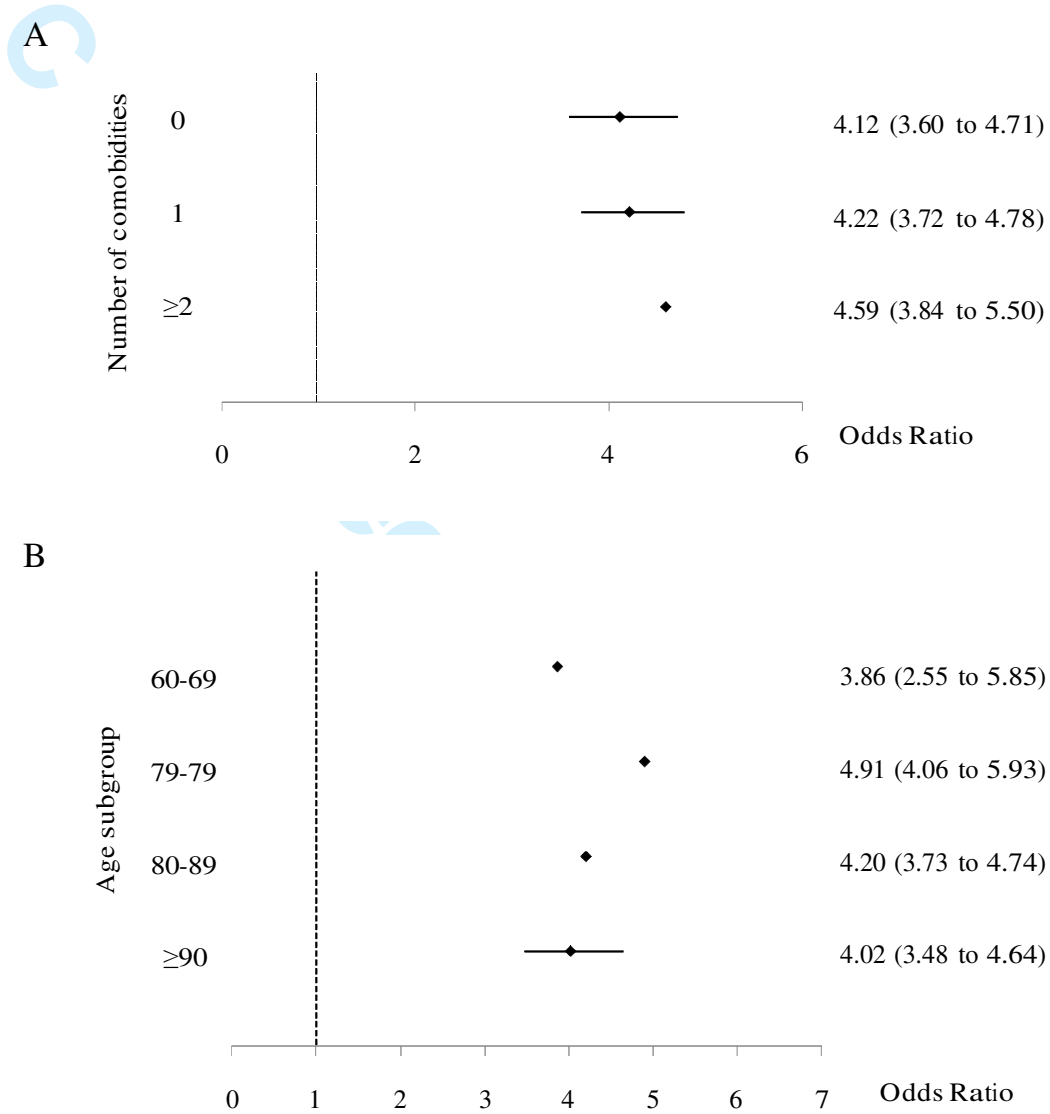

Fig 1



**Risk factors affecting in-hospital mortality after hip fracture: retrospective analysis using the Japanese Diagnosis Procedure Combination database**

|                                 |                                                                                                                                                                                                                                                                                                                                                                                                                                                                                                                                                                                                                                                                                                                                          |
|---------------------------------|------------------------------------------------------------------------------------------------------------------------------------------------------------------------------------------------------------------------------------------------------------------------------------------------------------------------------------------------------------------------------------------------------------------------------------------------------------------------------------------------------------------------------------------------------------------------------------------------------------------------------------------------------------------------------------------------------------------------------------------|
| Journal:                        | <i>BMJ Open</i>                                                                                                                                                                                                                                                                                                                                                                                                                                                                                                                                                                                                                                                                                                                          |
| Manuscript ID:                  | bmjopen-2011-000416.R1                                                                                                                                                                                                                                                                                                                                                                                                                                                                                                                                                                                                                                                                                                                   |
| Article Type:                   | Research                                                                                                                                                                                                                                                                                                                                                                                                                                                                                                                                                                                                                                                                                                                                 |
| Date Submitted by the Author:   | 19-Mar-2012                                                                                                                                                                                                                                                                                                                                                                                                                                                                                                                                                                                                                                                                                                                              |
| Complete List of Authors:       | Shoda, Naoko; The University of Tokyo, Department of Orthopaedic Surgery<br>Yasunaga, Hideo; Graduate School of Medicine University of Tokyo,<br>Department of Health Management and Policy<br>Horiguchi, Hiromasa; Graduate School of Medicine University of Tokyo,<br>Department of Health Management and Policy<br>Matsuda, Shinya; University of Occupational and Environmental Health,<br>Department of Preventive Medicine and Community Health<br>Ohe, Kazuhiko; University of Tokyo, Department of Medical Informatics and<br>Economics, Graduate School of Medicine<br>Kadono, Yuho; The University of Tokyo, Department of Orthopaedic Surgery<br>Tanaka, Sakae; The University of Tokyo, Department of Orthopaedic<br>Surgery |
| <b>Primary Subject Heading</b>: | Geriatric medicine                                                                                                                                                                                                                                                                                                                                                                                                                                                                                                                                                                                                                                                                                                                       |
| Secondary Subject Heading:      | Epidemiology, Surgery                                                                                                                                                                                                                                                                                                                                                                                                                                                                                                                                                                                                                                                                                                                    |
| Keywords:                       | Trauma management < ORTHOPAEDIC & TRAUMA SURGERY, Bone<br>diseases < ORTHOPAEDIC & TRAUMA SURGERY, Hip < ORTHOPAEDIC &<br>TRAUMA SURGERY, TRAUMA MANAGEMENT                                                                                                                                                                                                                                                                                                                                                                                                                                                                                                                                                                              |
|                                 |                                                                                                                                                                                                                                                                                                                                                                                                                                                                                                                                                                                                                                                                                                                                          |

SCHOLARONE™  
Manuscripts



1 *Shoda et al.*

2  
3  
4  
5  
6 **Risk factors affecting in-hospital mortality after hip fracture: retrospective**  
7  
8  
9 **analysis using the Japanese Diagnosis Procedure Combination database**  
10

11 Naoko Shoda, researcher<sup>1</sup> Hideo Yasunaga, associate professor<sup>2</sup> Hiromasa Horiguchi,  
12  
13 lecturer<sup>2</sup> Shinya Matsuda, professor<sup>3</sup> Kazuhiko Ohe, professor<sup>4</sup> Yuho Kadono, assistant  
14  
15 professor<sup>1</sup> Sakae Tanaka, professor<sup>1</sup>  
16  
17

18  
19  
20 <sup>1</sup> Department of Orthopaedic Surgery, Graduate School of Medicine, The University of  
21  
22 Tokyo, 7-3-1 Hongo, Bunkyo-ku, Tokyo 113-0033, Japan  
23  
24

25  
26 <sup>2</sup> Department of Health Management and Policy, Graduate School of Medicine, The  
27  
28 University of Tokyo, 7-3-1 Hongo, Bunkyo-ku, Tokyo 113-0033, Japan  
29  
30

31  
32 <sup>3</sup> Department of Preventive Medicine and Community Health, University of  
33  
34 Occupational and Environmental Health, 1-1 Iseigaoka, Yahatanishi-ku, Kitakyushu,  
35  
36  
37 Japan  
38  
39

40  
41 <sup>4</sup> Department of Medical Informatics and Economics, Graduate School of Medicine, The  
42  
43 University of Tokyo, 7-3-1 Hongo, Bunkyo-ku, Tokyo 113-0033, Japan  
44  
45

46 **Correspondence to:** S Tanaka, Department of Orthopaedic Surgery, Faculty of  
47  
48 Medicine, The University of Tokyo, 7-3-1 Hongo, Bunkyo-ku, Tokyo 113-0033, Japan  
49  
50

51  
52 Tel: +81-3-3815-5415 ext 33376; Fax: +81-3-3818-4082  
53  
54

55 [TANAKAS-ORT@h.u-tokyo.ac.jp](mailto:TANAKAS-ORT@h.u-tokyo.ac.jp)  
56  
57

Shoda et al.

## Article Summary

### Article focus

- Hip fracture leads to impaired function, loss of independence and increased mortality of the patients.
- The aim of this study is to identify risk factors for in-hospital mortality in patients with hip fractures

### Key messages

- Using the Japanese Diagnosis Procedure Combination (DPC) nationwide administrative claims database, we analysed 80,800 hip fracture patients in total.
- The overall in-hospital mortality rate was 3.3%, and the in-hospital mortality was significantly associated with male gender (OR 2.12 compared with female gender;  $p < 0.001$ ), advancing age (OR 1.57 in the 70–79 years age group, 2.28 in the 80–89 years group and 3.51 in the  $\geq 90$  years group compared with the 60–69 years age group,  $p < 0.001$ ), conservative treatment (OR 4.25 compared with the surgical treatment group,  $p < 0.001$ ), and number of comorbidities (OR 2.50 in patients with one comorbidity and 3.79 in those with two or more comorbidities as compared with no comorbidity,  $p < 0.001$ ). W
- The proportion of patients with delay to surgery of 5 days or longer was 53.6%, and

Shoda et al.

1  
2  
3  
4  
5  
6 the delay was significantly associated with a higher rate of in-hospital mortality (OR  
7  
8  
9 1.34; 95% CI 1.20 to 1.50), while there was no significant difference in mortality  
10  
11  
12 among patients undergoing surgery within 4 days.

### 13 14 15 **Strengths and limitations of this study**

- 16  
17  
18 ■ We analysed a large number of patients using the Japanese DPC administrative  
19  
20  
21  
22  
23  
24  
25  
26  
27  
28  
29  
30  
31  
32  
33  
34  
35  
36  
37  
38  
39  
40  
41  
42  
43  
44  
45  
46  
47  
48  
49  
50  
51  
52  
53  
54  
55  
56  
57  
58  
59  
60  
claims database, which included approximately 40% of all the in-patient admissions  
to acute care hospitals in Japan.
- Complications occurring after admission are clearly differentiated with  
comorbidities that were already present at admission.
- This is a retrospective observational study, and the database includes information  
only during the hospitalisation.

1 *Shoda et al.*  
2  
3  
4  
5

6 **Abstract**  
7

8 **Objective:** To identify risk factors for in-hospital mortality in patients with hip fractures  
9 using the Japanese Diagnosis Procedure Combination (DPC) nationwide administrative  
10 claims database.  
11  
12  
13  
14  
15

16 **Design:** Retrospective observational study.  
17

18 **Setting:** Hospitals adopting the DPC system during 2007–2009.  
19

20 **Participants:** We extracted a total of 80,800 eligible patients aged  $\geq 60$  years old with a  
21 single hip fracture (ICD-10 codes: S72.0 and S72.1). The DPC database includes  
22 patients treated between July and December each year.  
23  
24  
25  
26  
27  
28  
29  
30  
31

32 **Main outcome measures:** In-hospital mortality after hip fracture.  
33

34 **Results:** The overall in-hospital mortality rate after hip fractures was 3.3%. Multivariate  
35 analysis indicated that in-hospital mortality was significantly associated with male  
36 gender (odds ratio [OR] 2.12; 95% confidence interval [CI] 1.94 to 2.31), advancing age  
37 and number of comorbidities. Significantly higher mortality was observed in those  
38 treated conservatively (OR 4.25; 95% CI 3.92 to 4.61). Surgical delays of 5 days or  
39 more were significantly associated with higher rates of in-hospital mortality (OR 1.34;  
40 95% CI 1.20 to 1.50).  
41  
42  
43  
44  
45  
46  
47  
48  
49  
50  
51  
52  
53  
54

55 **Conclusions:** In patients with hip fractures, male gender, advancing age, high number  
56  
57  
58  
59  
60

1  
2  
3  
4  
5  
6  
7  
8  
9  
10  
11  
12  
13  
14  
15  
16  
17  
18  
19  
20  
21  
22  
23  
24  
25  
26  
27  
28  
29  
30  
31  
32  
33  
34  
35  
36  
37  
38  
39  
40  
41  
42  
43  
44  
45  
46  
47  
48  
49  
50  
51  
52  
53  
54  
55  
56  
57  
58  
59  
60

*Shoda et al.*

of comorbidities and the surgical delay of 5 days or more were associated with higher rates of in-hospital mortality.

For peer review only

Shoda et al.

## INTRODUCTION

Hip fracture is a serious injury related to bone fragility caused by osteoporosis, and it has emerged as a public health burden in an aging society such as that of Japan.<sup>1-5</sup> It is estimated that the number of hip fractures worldwide will rise from 1.7 million in 1990 to 6.3 million in 2050.<sup>6</sup> Recent studies have reported an increased incidence of hip fractures in Japan<sup>3,5</sup> although the incidence is decreasing in some Western countries.<sup>7,8</sup> Hip fracture leads to impaired function, loss of independence and increased mortality of the patients. It has been reported that the increased mortality after hip fracture is associated with many factors such as increasing age, comorbidity and pre-fracture functional disability of the patients.<sup>9-12</sup> Hip fractures are usually treated by orthopaedic surgical procedures such as hemiarthroplasty or internal fixation, and several studies have shown that early surgery is associated with lower rates of mortality,<sup>13-16</sup> while other studies exhibited no benefit of early surgery in reducing mortality or improving functional recovery.<sup>17,18</sup> Conservative treatment is often chosen for patients with severe comorbidities. However, it is not clear whether conservative treatment is actually superior in reducing mortality compared with surgical treatment in high risk patients. In this study, we investigated the in-hospital mortality rate of hip fracture patients using data from the Japanese Diagnosis Procedure Combination (DPC) nationwide

1 *Shoda et al.*

2  
3  
4  
5  
6 administrative claims database, and compared mortality following hip fractures between  
7  
8  
9 groups treated surgically or conservatively.

## 10 11 12 13 14 **METHODS**

### 15 16 17 **DPC database**

18  
19  
20 The DPC database is a diagnosis-dominant case-mix system administered by the  
21  
22  
23 Ministry of Health, Labour and Welfare of Japan, and linked with a lump-sum payment  
24  
25  
26 system.<sup>19</sup> All 82 university teaching hospitals in Japan are obliged to adopt the DPC  
27  
28  
29 system, while adoption by community hospitals is voluntary. A comprehensive survey  
30  
31  
32 of the DPC hospitals is conducted between July 1 and December 31 each year by the  
33  
34  
35 DPC Research Group, funded by the Japanese government. Detailed patient data, as  
36  
37  
38 well as administrative claims data, are collected for all the inpatients discharged from  
39  
40  
41 the participating hospitals between July 1 and December 31 each year. The number of  
42  
43  
44 participating hospitals increased to 818 with 2.57 million patients in 2009, which  
45  
46  
47 represented approximately 40% of all the in-patient admissions to acute care hospitals  
48  
49  
50 in Japan. Hospitals send all the anonymised data for each month to the DPC Research  
51  
52  
53 Group for compilation in the database server in the Department of Health Management  
54  
55  
56 and Policy, The University of Tokyo.

1 *Shoda et al.*  
2  
3  
4  
5

6 The database includes the following data: hospital location; patients' age and sex;  
7  
8 diagnoses, comorbidities at admission, and complications after admission, recorded in  
9 accordance with the International Classification of Diseases, 10th Revision (ICD-10)  
10 codes and text data in the Japanese language; procedures coded with the Japanese  
11 original K codes; comorbidities at admission; complications after admission coded with  
12 the ICD-10 codes; in-hospital mortality; length of stay; and hospital charges.  
13  
14  
15  
16  
17  
18  
19  
20  
21  
22

23 This study was based on a secondary analysis of the administrative claims data. The  
24 requirement for informed consent was waived because of the anonymous nature of the  
25 data. Study approval was obtained from the Institutional Review Board at the University  
26 of Occupational and Environmental Health.  
27  
28  
29  
30  
31  
32  
33  
34  
35  
36  
37

### 38 **Data compilation**

39 We retrospectively collected data of patients coded S72.0 (fracture of the neck of the  
40 femur) and S72.1 (peritrochanteric fracture) between 2007 and 2009 from the DPC  
41 database. Exclusion criteria were as follows: age < 60 years; patients with open  
42 fractures or multiple fractures; and incomplete data. We extracted data on age, sex,  
43 method of treatment (surgical or conservative), number of acute beds and in-hospital  
44 mortality. From the comorbidities at admission, we collected data on seven factors:  
45  
46  
47  
48  
49  
50  
51  
52  
53  
54  
55  
56  
57  
58  
59  
60



1 *Shoda et al.*

2  
3  
4  
5  
6 malignancy, diabetes mellitus, cardiovascular disease, cerebrovascular disease, lung  
7  
8  
9 disease, renal failure, hepatic failure.

### 14 **Statistical analysis**

15  
16  
17 The Chi-squared test was used for univariate comparisons of the surgical and  
18  
19 conservative treatment groups. Multivariate logistic regression analysis was performed  
20  
21 to analyse the confounding effects of various factors on in-hospital mortality. Odds  
22  
23 ratios (OR) and 95% confidence intervals (CI) were determined. The OR of in-hospital  
24  
25 mortality in conservatively treated patients was analysed in subgroups of patients  
26  
27 stratified according to number of comorbidities or age. In addition, the effect of surgical  
28  
29 delays in surgically treated patients was analysed. A p-value <0.05 was considered  
30  
31 significant. All the statistical analyses were performed using SPSS Statistics ver. 19.0  
32  
33 (IBM SPSS Inc.; Chicago, IL, US).  
34  
35  
36  
37  
38  
39  
40  
41  
42  
43  
44  
45  
46

47 **Data sharing statement:** No additional data are available.  
48  
49  
50  
51

## 52 **RESULTS**

### 53 **Patient background**

1 *Shoda et al.*

2  
3  
4  
5  
6 Data of 94,139 patients with hip fractures were extracted based on ICD-10 codes. We  
7  
8  
9 excluded 8,956 patients with open fractures or multiple fractures, 496 patients with  
10  
11  
12 incomplete data and 3887 patients aged <60 years. Finally, 80,800 eligible patients were  
13  
14  
15 included in the analysis.

16  
17  
18 Table 1 presents the patient characteristics. Overall, 79.1% were females. The mean  
19  
20 (standard deviation) age was 82.8 (8.3) years. The patients were categorised into the  
21  
22  
23 following four age groups: 60–69 (n=5,523), 70–79 (n=18,618), 80–89 (n=37,362), and  
24  
25  
26  $\geq 90$  (n=19,297). Approximately 83% (n=66,893) of patients underwent surgical  
27  
28  
29 treatment, while 17% (n=13,907) were treated conservatively. Hospital size was  
30  
31  
32 categorised into four groups according to the number of acute beds:  $\leq 199$  (13.9%),  
33  
34  
35 200–399 (40.4%), 400–599 (28.6%), and  $\geq 600$  (15.0%). The proportion of patients with  
36  
37  
38 comorbidities at admission was as follows: malignancy (5.7%), diabetes mellitus  
39  
40  
41 (13.4%), cardiovascular disease (7.6%), cerebrovascular disease (8.0%), lung disease  
42  
43  
44 (6.4%), renal failure (4.4%) and hepatic failure (0.8%).  
45  
46  
47  
48  
49

### 50 **Univariate analysis of in-hospital mortality**

51  
52 Table 2 shows the factors associated with in-hospital mortality according to the  
53  
54  
55 univariate analysis. The overall in-hospital mortality rate was 3.3% (n=2,681) with the  
56  
57  
58  
59  
60

1 *Shoda et al.*

2  
3  
4  
5  
6 average length of stay of 38 days. Male gender, advancing age, conservative treatment  
7  
8 and smaller hospital size were significantly associated with higher mortality. As for  
9  
10 comorbidities, patients with malignancy, lung disease, renal failure and hepatic failure at  
11  
12 admission exhibited higher mortality rates. In contrast, diabetes mellitus, cardiovascular  
13  
14 disease or cerebrovascular disease did not significantly affect the mortality of the  
15  
16 patients. The number of comorbidities at admission was positively related to the  
17  
18 mortality rate.  
19  
20  
21  
22  
23  
24  
25  
26  
27  
28

### 29 **Multivariate analysis of in-hospital mortality**

30  
31  
32 Table 3 shows the adjusted OR and 95% CI for in-hospital mortality as determined by  
33  
34 multivariate analysis. Consistent with the univariate analysis, the in-hospital mortality  
35  
36 was significantly associated with male gender (OR 2.12 compared with female gender;  
37  
38  $p < 0.001$ ), advancing age (OR 1.57 in the 70–79 years age group, 2.28 in the 80–89  
39  
40 years group and 3.51 in the  $\geq 90$  years group compared with the 60–69 years age group,  
41  
42  $p < 0.001$ ), conservative treatment (OR 4.25 compared with the surgical treatment group,  
43  
44  $p < 0.001$ ), and number of comorbidities (OR 2.50 in patients with one comorbidity and  
45  
46 3.79 in those with two or more comorbidities as compared with no comorbidity,  
47  
48  $p < 0.001$ ). There was no association with hospital size. We then stratified the patients  
49  
50  
51  
52  
53  
54  
55  
56  
57  
58  
59  
60

1 *Shoda et al.*

2  
3  
4  
5  
6 into the following three groups according to the number of comorbidities: no  
7  
8  
9 comorbidity (n=51,544), one comorbidity (n=22,170), and two or more comorbidities  
10  
11 (n=7,086). Regardless of the number of comorbidities, conservative treatment was  
12  
13 significantly associated with higher mortality compared with surgical treatment (fig 1A).  
14  
15 In addition, patients with conservative treatment exhibited higher mortality even the  
16  
17 patients were stratified according to age (fig 1B).  
18  
19  
20  
21

22  
23 We finally analysed the effect of surgical delays on in-hospital mortality in patients  
24  
25 treated surgically. The proportion of patients with delay to surgery of 5 days or longer  
26  
27 was 53.6%, and the delay was significantly associated with a higher rate of in-hospital  
28  
29 mortality (OR 1.34; 95% CI 1.20 to 1.50), while there was no significant difference in  
30  
31 mortality among patients undergoing surgery within 4 days.  
32  
33  
34  
35  
36  
37  
38  
39  
40

## 41 **DISCUSSION**

42  
43 Previous studies have reported that 3.6% to 6.0% of patients with hip fractures die  
44  
45 during hospitalisation,<sup>9 20</sup> and that the 1-year mortality rate is between 10.1% and  
46  
47 27.3%.<sup>12 21</sup> The reasons for the high mortality rate after hip fracture have been  
48  
49 extensively studied. Frost et al. recently reported that men had a 2.4 times higher risk of  
50  
51 in-hospital death compared with women, and advancing age increased the risk by 2.06  
52  
53  
54  
55  
56  
57  
58  
59  
60

1 *Shoda et al.*

2  
3  
4  
5  
6 times for every 10-year increase in age.<sup>9</sup> Maggi et al. reported that 6-month mortality  
7  
8  
9 was positively associated with increasing age, comorbidity, pre-fracture functional  
10  
11  
12 disability and having surgery more than 48 hours after admission.<sup>22</sup> Hu et al. identified  
13  
14  
15 the following 12 preoperative predictors of postoperative mortality in hip fracture  
16  
17  
18 patients through systematic review: advanced age, male gender, nursing home or facility  
19  
20  
21 residence, poor preoperative walking capacity, poor activities of daily living, higher  
22  
23  
24 ASA (American Society of Anesthesiologists) grading, poor mental state, multiple  
25  
26  
27 comorbidities, dementia or cognitive impairment, diabetes, cancer and cardiac disease.<sup>10</sup>  
28

29  
30 In this study, we investigated the in-hospital mortality rate after hip fractures using  
31  
32 the Japanese DPC administrative claims database. The DPC database is equivalent in  
33  
34  
35 several ways to the Nationwide Inpatient Sample database in the United States, but there  
36  
37  
38 is an advantage of the DPC database whereby complications occurring after admission  
39  
40  
41 are clearly differentiated with comorbidities that were already present at admission.  
42

43  
44 In our study, 83% of the patients underwent surgery and 17% were treated  
45  
46  
47 conservatively, which were similar rates to previous studies<sup>21</sup>. The proportion of  
48  
49  
50 conservative treatment was higher than that in the Western countries, which may be due  
51  
52  
53 to the insurance system in Japan, which allows patients a longer hospital stay.  
54

55  
56 Overall, 3.3% of patients died during the hospitalisation. The mortality rate was  
57  
58

1 *Shoda et al.*  
2  
3  
4  
5

6 slightly lower than that in previous reports. In multivariate analysis, we found that male  
7  
8  
9 gender, advancing age and number of comorbidities were positively and independently  
10  
11  
12 associated with the mortality, which is consistent with previous studies. The size of  
13  
14  
15 hospital as determined by the number of acute beds had no significant relationship with  
16  
17  
18 in-hospital mortality in our study. This result may suggest that high risk patients are not  
19  
20  
21 necessarily treated at large hospitals. Schilling et al. reported that decreased  
22  
23  
24 hospital-wide nurse staffing levels are associated with increased in-hospital mortality  
25  
26  
27 among patients with hip fracture.<sup>20</sup> In contrast, Browne et al. reported that hospital  
28  
29  
30 volume is not associated with decreased mortality in the treatment of hip fractures.<sup>23</sup>  
31  
32 There are various scales to represent hospital quality, so more studies may be needed to  
33  
34  
35 clarify the relationship between hospital quality and hip fracture mortality.  
36  
37

38 Interestingly, conservative treatment was an independent risk factor for in-hospital  
39  
40  
41 mortality. The analysis indicated that this did not arise because of patients with higher  
42  
43  
44 risks being more likely to undergo conservative treatment, because patients treated  
45  
46  
47 conservatively exhibited more than four times higher risk for mortality even after  
48  
49  
50 stratification according to the number of comorbidities or age. The exact reason for the  
51  
52  
53 higher mortality in conservatively treated patients is unclear, but the patients treated  
54  
55  
56 surgically can start rehabilitation earlier, and therefore avoid the complications caused  
57  
58  
59  
60

1 *Shoda et al.*

2  
3  
4  
5  
6 by long-term bed rest such as bedsores, venous thromboembolism, atelectasis and  
7  
8  
9 hypostatic pneumonia.

10  
11 We found that surgical delays of 5 days or more were significantly associated with  
12  
13 higher rates of in-hospital mortality, which was consistent with the recent prospective  
14  
15 cohort study by Vidan et al., showing that surgical delays longer than 5 days were  
16  
17 associated with higher mortality and medical complication rates.<sup>15</sup>  
18  
19  
20  
21  
22

23 Our study has several limitations. First, this is a retrospective observational study.  
24  
25 Thus, patient allocation was non-randomised and the cohort of patients we used did not  
26  
27 constitute random sampling. Consequently, our results are potentially biased due to  
28  
29 unmeasured confounders. Second, the DPC adopting hospitals are generally of large  
30  
31 size although the DPC database covered more than 40% of all inpatient admissions in  
32  
33 Japan. Third, this database is for administrative claims, so recorded diagnoses may be  
34  
35 less well validated than in planned prospective surveys. Finally, this database includes  
36  
37 information only during the hospitalisation, and we were unable to determine the  
38  
39 condition of patients before admission or after discharge. Despite these limitations, our  
40  
41 study provides helpful information about the risk factors of in-hospital mortality for  
42  
43 treatment decision-making in patients with hip fractures.  
44  
45  
46  
47  
48  
49  
50  
51  
52  
53  
54  
55  
56  
57  
58  
59  
60

1 *Shoda et al.*  
2  
3  
4  
5

## 6 **CONCLUSION**

7  
8  
9 This study has shown that male gender, advancing age, high number of comorbidities  
10  
11 and surgical delay were associated with higher rates of in-hospital mortality in patients  
12  
13 with hip fractures.  
14  
15  
16  
17  
18  
19

## 20 **Acknowledgement**

21  
22  
23 **Contributors:** NS, HY, HH and ST designed the study, analysed and interpreted the  
24  
25 data, and drafted the manuscript. YK contributed to the study design, analysis and  
26  
27 interpretation of the data. SM interpreted the data and made significant contributions to  
28  
29 drafts of the manuscript. All authors had full access to all data (including statistical  
30  
31 reports and tables) in the study and take responsibility for the integrity of the data and  
32  
33 the accuracy of the data analysis. SN, HY and ST are guarantors.  
34  
35  
36  
37  
38  
39

40 **Funding:** This study was supported in part by Grants-in-Aid for Research on Policy  
41  
42 Planning and Evaluation from the Ministry of Health, Labour and Welfare, Japan; the  
43  
44 Funding Program for World-Leading Innovative R&D on Science and Technology  
45  
46 (FIRST program) from the Council for Science and Technology Policy, Japan; and a  
47  
48 research grant from Japan Osteoporosis Foundation. The funding source was not  
49  
50 involved in the design, conduct or interpretation of the study, or in the writing of the  
51  
52  
53  
54  
55  
56  
57  
58  
59  
60



1  
2  
3  
4  
5  
6  
7  
8  
9  
10  
11  
12  
13  
14  
15  
16  
17  
18  
19  
20  
21  
22  
23  
24  
25  
26  
27  
28  
29  
30  
31  
32  
33  
34  
35  
36  
37  
38  
39  
40  
41  
42  
43  
44  
45  
46  
47  
48  
49  
50  
51  
52  
53  
54  
55  
56  
57  
58  
59  
60

*Shoda et al.*

submitted work.

**Competing interests:** None declared.

**Ethical approval:** Not needed

For peer review only

Shoda et al.

## References

1. Gullberg B, Johnell O, Kanis JA. World-wide projections for hip fracture. *Osteoporosis international : a journal established as result of cooperation between the European Foundation for Osteoporosis and the National Osteoporosis Foundation of the USA* 1997;7(5):407-13.
2. Hagino H, Furukawa K, Fujiwara S, et al. Recent trends in the incidence and lifetime risk of hip fracture in Tottori, Japan. *Osteoporosis international : a journal established as result of cooperation between the European Foundation for Osteoporosis and the National Osteoporosis Foundation of the USA* 2009;20(4):543-8.
3. Hagino H, Sakamoto K, Harada A, et al. Nationwide one-decade survey of hip fractures in Japan. *Journal of orthopaedic science : official journal of the Japanese Orthopaedic Association* 2010;15(6):737-45.
4. Johnell O, Kanis JA. An estimate of the worldwide prevalence, mortality and disability associated with hip fracture. *Osteoporosis international : a journal established as result of cooperation between the European Foundation for Osteoporosis and the National Osteoporosis Foundation of the USA* 2004;15(11):897-902.
5. Orimo H, Yaegashi Y, Onoda T, et al. Hip fracture incidence in Japan: estimates of new patients in 2007 and 20-year trends. *Arch Osteoporos* 2009;4(1-2):71-77.
6. Sambrook P, Cooper C. Osteoporosis. *Lancet* 2006;367(9527):2010-8.
7. Abrahamsen B, Vestergaard P. Declining incidence of hip fractures and the extent of use of anti-osteoporotic therapy in Denmark 1997-2006. *Osteoporosis international : a journal established as result of cooperation between the European Foundation for Osteoporosis and the National Osteoporosis Foundation of the USA* 2010;21(3):373-80.
8. Leslie WD, O'Donnell S, Jean S, et al. Trends in hip fracture rates in Canada. *JAMA : the journal of the American Medical Association* 2009;302(8):883-9.
9. Frost SA, Nguyen ND, Black DA, et al. Risk factors for in-hospital post-hip fracture mortality. *Bone* 2011;49(3):553-8.
10. Hu F, Jiang C, Shen J, et al. Preoperative predictors for mortality following hip fracture surgery: A systematic review and meta-analysis. *Injury* 2011.
11. Meyer HE, Tverdal A, Falch JA, et al. Factors associated with mortality after hip fracture. *Osteoporosis international : a journal established as result of cooperation between the European Foundation for Osteoporosis and the National Osteoporosis Foundation of the USA* 2000;11(3):228-32.
12. Panula J, Pihlajamaki H, Mattila VM, et al. Mortality and cause of death in hip fracture

Shoda et al.

- 1  
2  
3  
4  
5 patients aged 65 or older: a population-based study. *BMC Musculoskelet Disord*  
6 2011;12:105.  
7  
8 13. Bottle A, Aylin P. Mortality associated with delay in operation after hip fracture:  
9 observational study. *BMJ* 2006;332(7547):947-51.  
10  
11 14. Gdalevich M, Cohen D, Yosef D, et al. Morbidity and mortality after hip fracture: the  
12 impact of operative delay. *Archives of orthopaedic and trauma surgery*  
13 2004;124(5):334-40.  
14  
15 15. Vidan MT, Sanchez E, Gracia Y, et al. Causes and effects of surgical delay in patients  
16 with hip fracture: a cohort study. *Annals of internal medicine* 2011;155(4):226-33.  
17  
18 16. Simunovic N, Devereaux PJ, Sprague S, et al. Effect of early surgery after hip fracture  
19 on mortality and complications: systematic review and meta-analysis. *CMAJ :  
20 Canadian Medical Association journal = journal de l'Association medicale  
21 canadienne* 2010;182(15):1609-16.  
22  
23 17. Orosz GM, Magaziner J, Hannan EL, et al. Association of timing of surgery for hip  
24 fracture and patient outcomes. *JAMA : the journal of the American Medical  
25 Association* 2004;291(14):1738-43.  
26  
27 18. Siegmeth AW, Gurusamy K, Parker MJ. Delay to surgery prolongs hospital stay in  
28 patients with fractures of the proximal femur. *The Journal of bone and joint surgery.  
29 British volume* 2005;87(8):1123-6.  
30  
31 19. Matsuda S, Ishikawa KB, Kuwabara K, et al. Development and use of the Japanese  
32 case-mix system. *Eurohealth* 2009;14(3):25-30.  
33  
34 20. Schilling P, Goulet JA, Dougherty PJ. Do Higher Hospital-wide Nurse Staffing Levels  
35 Reduce In-hospital Mortality in Elderly Patients with Hip Fractures: A Pilot Study.  
36 *Clin Orthop Relat Res* 2011.  
37  
38 21. Sakamoto K, Nakamura T, Hagino H, et al. Report on the Japanese Orthopaedic  
39 Association's 3-year project observing hip fractures at fixed-point hospitals. *Journal  
40 of orthopaedic science : official journal of the Japanese Orthopaedic Association*  
41 2006;11(2):127-34.  
42  
43 22. Maggi S, Siviero P, Wetle T, et al. A multicenter survey on profile of care for hip fracture:  
44 predictors of mortality and disability. *Osteoporosis international : a journal  
45 established as result of cooperation between the European Foundation for  
46 Osteoporosis and the National Osteoporosis Foundation of the USA*  
47 2010;21(2):223-31.  
48  
49 23. Browne JA, Pietrobon R, Olson SA. Hip fracture outcomes: does surgeon or hospital  
50 volume really matter? *The Journal of trauma* 2009;66(3):809-14.  
51  
52  
53  
54  
55  
56  
57  
58  
59  
60

1 *Shoda et al.*

2  
3  
4  
5  
6 **Figure legends**

7  
8  
9 **Fig 1** Odds ratios of in-hospital mortality and 95% confidence intervals in hip fracture  
10  
11 patients treated conservatively. **A.** Patients were stratified into three groups according to  
12  
13 the number of comorbidities. **B.** Patients were stratified into four groups according to  
14  
15 age.  
16  
17  
18  
19  
20  
21  
22  
23  
24  
25  
26  
27  
28  
29  
30  
31  
32  
33  
34  
35  
36  
37  
38  
39  
40  
41  
42  
43  
44  
45  
46  
47  
48  
49  
50  
51  
52  
53  
54  
55  
56  
57  
58  
59  
60

Shoda et al.

Table 1 Patient characteristics

|                                             | n      | (%)    |
|---------------------------------------------|--------|--------|
| <b>Gender</b>                               |        |        |
| Females                                     | 63,920 | (79.1) |
| Males                                       | 16,880 | (20.9) |
| <b>Age</b>                                  |        |        |
| 60–69                                       | 5,523  | (6.8)  |
| 70–79                                       | 18,618 | (23.0) |
| 80–89                                       | 37,362 | (46.2) |
| ≥90                                         | 19,297 | (23.9) |
| <b>Treatment</b>                            |        |        |
| Surgical                                    | 66,893 | (82.8) |
| Conservative                                | 13,907 | (17.2) |
| <b>Hospital size (number of acute beds)</b> |        |        |
| ≤199                                        | 11,243 | (13.9) |
| 200–399                                     | 32,613 | (40.4) |
| 400–599                                     | 23,125 | (28.6) |
| ≥600                                        | 12,099 | (15.0) |
| <b>Comorbidities</b>                        |        |        |
| Malignancy                                  | 4,753  | (5.7)  |
| Diabetes mellitus                           | 10,795 | (13.4) |
| Cardiovascular disease                      | 6,147  | (7.6)  |
| Cerebrovascular disease                     | 6,438  | (8.0)  |
| Lung disease                                | 5,179  | (6.4)  |
| Renal failure                               | 3,554  | (4.4)  |
| Hepatic failure                             | 646    | (0.8)  |
| <b>Number of comorbidities</b>              |        |        |
| 0                                           | 51,544 | (63.8) |
| 1                                           | 22,170 | (27.4) |
| ≥2                                          | 7,086  | (8.8)  |

Shoda et al.

Table 2 Risk factors for in-hospital mortality (univariate analysis)

|                                             | In-hospital mortality |        |         |
|---------------------------------------------|-----------------------|--------|---------|
|                                             | n                     | (%)    | p-value |
| <b>Total</b>                                | 2681                  | (3.3)  |         |
| <b>Gender</b>                               |                       |        |         |
| Females                                     | 1677                  | (2.6)  | <0.001  |
| Males                                       | 1004                  | (5.9)  |         |
| <b>Age</b>                                  |                       |        |         |
| 60–69                                       | 97                    | (1.8)  | <0.001  |
| 70–79                                       | 488                   | (2.6)  |         |
| 80–89                                       | 1223                  | (3.3)  |         |
| ≥90                                         | 873                   | (4.5)  |         |
| <b>Treatment</b>                            |                       |        |         |
| Surgical                                    | 1372                  | (2.1)  | <0.001  |
| Conservative                                | 1309                  | (9.4)  |         |
| <b>Hospital size (number of acute beds)</b> |                       |        |         |
| ≤199                                        | 454                   | (4.0)  | <0.001  |
| 200–399                                     | 1080                  | (3.3)  |         |
| 400–599                                     | 672                   | (2.9)  |         |
| ≥600                                        | 412                   | (3.4)  |         |
| <b>Comorbidities</b>                        |                       |        |         |
| Malignancy                                  | 669                   | (14.6) | <0.001  |
| Diabetes mellitus                           | 365                   | (3.4)  | 0.694   |
| Cardiovascular disease                      | 198                   | (3.2)  | 0.659   |
| Cerebrovascular disease                     | 215                   | (3.3)  | 0.920   |
| Lung disease                                | 516                   | (10.0) | <0.001  |
| Renal failure                               | 305                   | (8.6)  | <0.001  |
| Hepatic failure                             | 126                   | (19.5) | <0.001  |
| <b>Number of comorbidities</b>              |                       |        |         |
| 0                                           | 968                   | (1.9)  | <0.001  |
| 1                                           | 1139                  | (5.1)  |         |
| ≥2                                          | 574                   | (8.1)  |         |

Shoda et al.

Table 3 Risk factors for in-hospital mortality (multivariate analysis)

|                                             | Odds ratio | 95% confidence interval | p-value |
|---------------------------------------------|------------|-------------------------|---------|
| <b>Gender</b>                               |            |                         |         |
| Females                                     | reference  |                         |         |
| Males                                       | 2.12       | 1.94 to 2.31            | <0.001  |
| <b>Age</b>                                  |            |                         |         |
| 60–69                                       | reference  |                         |         |
| 70–79                                       | 1.57       | 1.25 to 1.96            | <0.001  |
| 80–89                                       | 2.28       | 1.84 to 2.82            | <0.001  |
| ≥90                                         | 3.51       | 2.83 to 4.37            | <0.001  |
| <b>Treatment</b>                            |            |                         |         |
| Surgical                                    | reference  |                         |         |
| Conservative                                | 4.25       | 3.92 to 4.61            | <0.001  |
| <b>Hospital size (number of acute beds)</b> |            |                         |         |
| ≤199                                        | reference  |                         |         |
| 200–399                                     | 0.99       | 0.88 to 1.11            | 0.814   |
| 400–599                                     | 0.88       | 0.77 to 1.00            | 0.043   |
| ≥600                                        | 0.93       | 0.81 to 1.07            | 0.304   |
| <b>Number of comorbidities</b>              |            |                         |         |
| 0                                           | reference  |                         |         |
| 1                                           | 2.50       | 2.28 to 2.74            | <0.001  |
| ≥2                                          | 3.79       | 3.38 to 4.24            | <0.001  |

1  
2  
3  
4  
5  
6  
7  
8  
9  
10  
11  
12  
13  
14  
15  
16  
17  
18  
19  
20  
21  
22  
23  
24  
25  
26  
27  
28  
29  
30  
31  
32  
33  
34  
35  
36  
37  
38  
39  
40  
41  
42  
43  
44  
45  
46  
47  
48  
49  
50  
51  
52  
53  
54  
55  
56  
57  
58  
59  
60

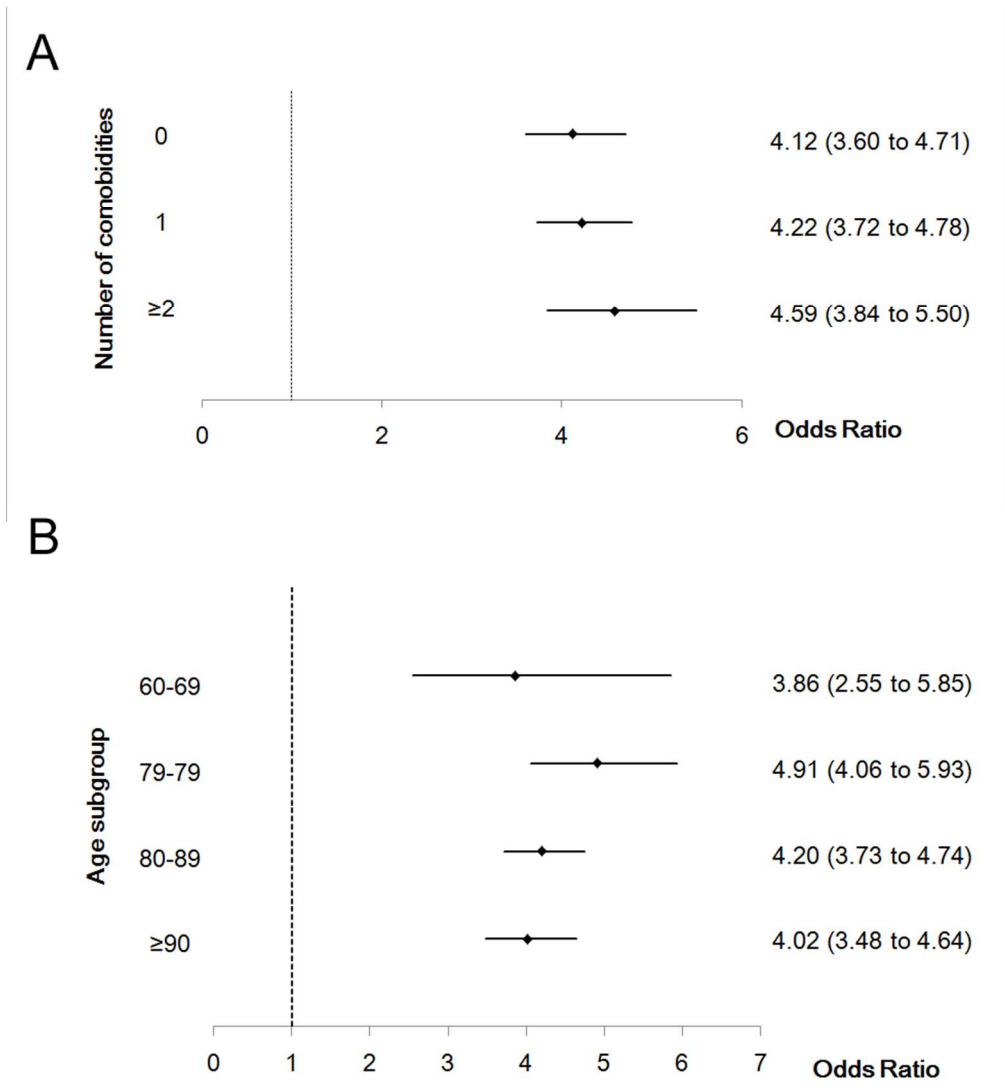

344x377mm (72 x 72 DPI)

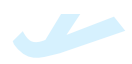



Shoda et al., Supplementary file

**Risk factors affecting in-hospital mortality after hip fracture: retrospective**

**analysis using the Japanese Diagnosis Procedure Combination database**

Naoko Shoda, researcher<sup>1</sup> Hideo Yasunaga, associate professor<sup>2</sup> Hiromasa Horiguchi,  
lecturer<sup>2</sup> Shinya Matsuda, professor<sup>3</sup> Kazuhiko Ohe, professor<sup>4</sup> Yuho Kadono, assistant  
professor<sup>1</sup> Sakae Tanaka, professor<sup>1</sup>

<sup>1</sup> Department of Orthopaedic Surgery, Graduate School of Medicine, The University of  
Tokyo, 7-3-1 Hongo, Bunkyo-ku, Tokyo 113-0033, Japan

<sup>2</sup> Department of Health Management and Policy, Graduate School of Medicine, The  
University of Tokyo, 7-3-1 Hongo, Bunkyo-ku, Tokyo 113-0033, Japan

<sup>3</sup> Department of Preventive Medicine and Community Health, University of  
Occupational and Environmental Health, 1-1 Iseigaoka, Yahatanishi-ku, Kitakyushu,  
Japan

<sup>4</sup> Department of Medical Informatics and Economics, Graduate School of Medicine, The  
University of Tokyo, 7-3-1 Hongo, Bunkyo-ku, Tokyo 113-0033, Japan

**Correspondence to:** S Tanaka, Department of Orthopaedic Surgery, Faculty of  
Medicine, The University of Tokyo, 7-3-1 Hongo, Bunkyo-ku, Tokyo 113-0033, Japan

Tel: +81-3-3815-5415 ext 33376; Fax: +81-3-3818-4082

[TANAKAS-ORT@h.u-tokyo.ac.jp](mailto:TANAKAS-ORT@h.u-tokyo.ac.jp)

## Article Summary

### Article focus

■ Hip fracture leads to impaired function, loss of independence and increased mortality of the patients.

■ The aim of this study is to identify risk factors for in-hospital mortality in patients with hip fractures

### Key messages

■ Using the Japanese Diagnosis Procedure Combination (DPC) nationwide administrative claims database, we analysed 80,800 hip fracture patients in total.

■ The overall in-hospital mortality rate was 3.3%, and the in-hospital mortality was significantly associated with male gender (OR 2.12 compared with female gender;  $p < 0.001$ ), advancing age (OR 1.57 in the 70–79 years age group, 2.28 in the 80–89 years group and 3.51 in the  $\geq 90$  years group compared with the 60–69 years age group,  $p < 0.001$ ), conservative treatment (OR 4.25 compared with the surgical treatment group,  $p < 0.001$ ), and number of comorbidities (OR 2.50 in patients with one comorbidity and 3.79 in those with two or more comorbidities as compared with no comorbidity,  $p < 0.001$ ). W

■ The proportion of patients with delay to surgery of 5 days or longer was 53.6%, and

1  
2  
3  
4  
5  
6 the delay was significantly associated with a higher rate of in-hospital mortality (OR  
7  
8  
9 1.34; 95% CI 1.20 to 1.50), while there was no significant difference in mortality  
10  
11  
12 among patients undergoing surgery within 4 days.

### 13 14 15 **Strengths and limitations of this study**

- 16  
17 ■ We analysed a large number of patients using the Japanese DPC administrative  
18  
19  
20  
21  
22  
23  
24  
25  
26  
27  
28  
29  
30  
31  
32  
33  
34  
35  
36  
37  
38  
39  
40  
41  
42  
43  
44  
45  
46  
47  
48  
49  
50  
51  
52  
53  
54  
55  
56  
57  
58  
59  
60  
claims database, which included approximately 40% of all the in-patient admissions  
to acute care hospitals in Japan.
- Complications occurring after admission are clearly differentiated with  
comorbidities that were already present at admission.
- This is a retrospective observational study, and the database includes information  
only during the hospitalisation.

1 *Shoda et al., Supplementary file*

2  
3  
4  
5  
6 **Abstract**

7  
8  
9 **Objective:** To identify risk factors for in-hospital mortality in patients with hip fractures  
10 using the Japanese Diagnosis Procedure Combination (DPC) nationwide administrative  
11 claims database.  
12  
13  
14

15  
16  
17 **Design:** Retrospective observational study.

18  
19  
20 **Setting:** Hospitals adopting the DPC system during 2007–2009.

21  
22  
23 **Participants:** We extracted a total of 80,800 eligible patients aged  $\geq 60$  years old with a  
24 single hip fracture (ICD-10 codes: S72.0 and S72.1). The DPC database includes  
25 patients treated between July and December each year.  
26  
27  
28

29  
30  
31 **Main outcome measures:** In-hospital mortality after hip fracture.

32  
33  
34 **Results:** The overall in-hospital mortality rate after hip fractures was 3.3%. Multivariate  
35 analysis indicated that in-hospital mortality was significantly associated with male  
36 gender (odds ratio [OR] 2.12; 95% confidence interval [CI] 1.94 to 2.31), advancing age  
37 and number of comorbidities. Significantly higher mortality was observed in those  
38 treated conservatively (OR 4.25; 95% CI 3.92 to 4.61). Surgical delays of 5 days or  
39 more were significantly associated with higher rates of in-hospital mortality (OR 1.34;  
40 95% CI 1.20 to 1.50).  
41  
42  
43  
44  
45  
46  
47  
48  
49  
50  
51  
52  
53

54  
55 **Conclusions:** In patients with hip fractures, male gender, advancing age, high number  
56  
57  
58  
59  
60

*Shoda et al., Supplementary file*

1  
2  
3  
4  
5  
6  
7  
8  
9  
10  
11  
12  
13  
14  
15  
16  
17  
18  
19  
20  
21  
22  
23  
24  
25  
26  
27  
28  
29  
30  
31  
32  
33  
34  
35  
36  
37  
38  
39  
40  
41  
42  
43  
44  
45  
46  
47  
48  
49  
50  
51  
52  
53  
54  
55  
56  
57  
58  
59  
60

of comorbidities and the surgical delay of 5 days or more were associated with higher rates of in-hospital mortality.

For peer review only

Shoda et al., Supplementary file

## INTRODUCTION

Hip fracture is a serious injury related to bone fragility caused by osteoporosis, and it has emerged as a public health burden in an aging society such as that of Japan.<sup>1-5</sup> It is estimated that the number of hip fractures worldwide will rise from 1.7 million in 1990 to 6.3 million in 2050.<sup>6</sup> Recent studies have reported an increased incidence of hip fractures in Japan<sup>3,5</sup> although the incidence is decreasing in some Western countries.<sup>7,8</sup> Hip fracture leads to impaired function, loss of independence and increased mortality of the patients. It has been reported that the increased mortality after hip fracture is associated with many factors such as increasing age, comorbidity and pre-fracture functional disability of the patients.<sup>9-12</sup> Hip fractures are usually treated by orthopaedic surgical procedures such as hemiarthroplasty or internal fixation, and several studies have shown that early surgery is associated with lower rates of mortality,<sup>13-16</sup> while other studies exhibited no benefit of early surgery in reducing mortality or improving functional recovery.<sup>17,18</sup> Conservative treatment is often chosen for patients with severe comorbidities. However, it is not clear whether conservative treatment is actually superior in reducing mortality compared with surgical treatment in high risk patients. In this study, we investigated the in-hospital mortality rate of hip fracture patients using data from the Japanese Diagnosis Procedure Combination (DPC) nationwide

1 *Shoda et al., Supplementary file*

2  
3  
4  
5  
6 administrative claims database, and compared mortality following hip fractures between  
7  
8  
9 groups treated surgically or conservatively.

## 10 11 12 13 14 **METHODS**

### 15 16 17 **DPC database**

18  
19  
20 The DPC database is a diagnosis-dominant case-mix system administered by the  
21  
22  
23 Ministry of Health, Labour and Welfare of Japan, and linked with a lump-sum payment  
24  
25  
26 system.<sup>19</sup> All 82 university teaching hospitals in Japan are obliged to adopt the DPC  
27  
28  
29 system, while adoption by community hospitals is voluntary. A comprehensive survey  
30  
31  
32 of the DPC hospitals is conducted between July 1 and December 31 each year by the  
33  
34  
35 DPC Research Group, funded by the Japanese government. Detailed patient data, as  
36  
37  
38 well as administrative claims data, are collected for all the inpatients discharged from  
39  
40  
41 the participating hospitals between July 1 and December 31 each year. The number of  
42  
43  
44 participating hospitals increased to 818 with 2.57 million patients in 2009, which  
45  
46  
47 represented approximately 40% of all the in-patient admissions to acute care hospitals  
48  
49  
50 in Japan. Hospitals send all the anonymised data for each month to the DPC Research  
51  
52  
53 Group for compilation in the database server in the Department of Health Management  
54  
55  
56 and Policy, The University of Tokyo.

1  
2  
3  
4  
5  
6  
7  
8  
9  
10  
11  
12  
13  
14  
15  
16  
17  
18  
19  
20  
21  
22  
23  
24  
25  
26  
27  
28  
29  
30  
31  
32  
33  
34  
35  
36  
37  
38  
39  
40  
41  
42  
43  
44  
45  
46  
47  
48  
49  
50  
51  
52  
53  
54  
55  
56  
57  
58  
59  
60

*Shoda et al., Supplementary file*

The database includes the following data: hospital location; patients' age and sex; diagnoses, comorbidities at admission, and complications after admission, recorded in accordance with the International Classification of Diseases, 10th Revision (ICD-10) codes and text data in the Japanese language; procedures coded with the Japanese original K codes; comorbidities at admission; complications after admission coded with the ICD-10 codes; in-hospital mortality; length of stay; and hospital charges.

This study was based on a secondary analysis of the administrative claims data. The requirement for informed consent was waived because of the anonymous nature of the data. Study approval was obtained from the Institutional Review Board at the University of Occupational and Environmental Health.

### **Data compilation**

We retrospectively collected data of patients coded S72.0 (fracture of the neck of the femur) and S72.1 (peritrochanteric fracture) between 2007 and 2009 from the DPC database. Exclusion criteria were as follows: age < 60 years; patients with open fractures or multiple fractures; and incomplete data. We extracted data on age, sex, method of treatment (surgical or conservative), number of acute beds and in-hospital mortality. From the comorbidities at admission, we collected data on seven factors:



1 *Shoda et al., Supplementary file*

2  
3  
4  
5  
6 malignancy, diabetes mellitus, cardiovascular disease, cerebrovascular disease, lung  
7  
8  
9 disease, renal failure, hepatic failure.

### 14 **Statistical analysis**

15  
16  
17 The Chi-squared test was used for univariate comparisons of the surgical and  
18  
19  
20 conservative treatment groups. Multivariate logistic regression analysis was performed  
21  
22  
23 to analyse the confounding effects of various factors on in-hospital mortality. Odds  
24  
25  
26 ratios (OR) and 95% confidence intervals (CI) were determined. The OR of in-hospital  
27  
28  
29 mortality in conservatively treated patients was analysed in subgroups of patients  
30  
31  
32 stratified according to number of comorbidities or age. In addition, the effect of surgical  
33  
34  
35 delays in surgically treated patients was analysed. A p-value <0.05 was considered  
36  
37  
38 significant. All the statistical analyses were performed using SPSS Statistics ver. 19.0  
39  
40  
41 (IBM SPSS Inc.; Chicago, IL, US).

42  
43  
44  
45  
46 **Data sharing statement:** No additional data are available.

## 51 **RESULTS**

### 52 **Patient background**

1 *Shoda et al., Supplementary file*

2  
3  
4  
5  
6 Data of 94,139 patients with hip fractures were extracted based on ICD-10 codes. We  
7  
8  
9 excluded 8,956 patients with open fractures or multiple fractures, 496 patients with  
10  
11  
12 incomplete data and 3887 patients aged <60 years. Finally, 80,800 eligible patients were  
13  
14  
15 included in the analysis.

16  
17  
18 Table 1 presents the patient characteristics. Overall, 79.1% were females. The mean  
19  
20 (standard deviation) age was 82.8 (8.3) years. The patients were categorised into the  
21  
22  
23 following four age groups: 60–69 (n=5,523), 70–79 (n=18,618), 80–89 (n=37,362), and  
24  
25  
26  $\geq 90$  (n=19,297). Approximately 83% (n=66,893) of patients underwent surgical  
27  
28  
29 treatment, while 17% (n=13,907) were treated conservatively. Hospital size was  
30  
31  
32 categorised into four groups according to the number of acute beds:  $\leq 199$  (13.9%),  
33  
34  
35 200–399 (40.4%), 400–599 (28.6%), and  $\geq 600$  (15.0%). The proportion of patients with  
36  
37  
38 comorbidities at admission was as follows: malignancy (5.7%), diabetes mellitus  
39  
40  
41 (13.4%), cardiovascular disease (7.6%), cerebrovascular disease (8.0%), lung disease  
42  
43  
44 (6.4%), renal failure (4.4%) and hepatic failure (0.8%).  
45  
46  
47  
48

#### 49 **Univariate analysis of in-hospital mortality**

50  
51  
52 Table 2 shows the factors associated with in-hospital mortality according to the  
53  
54  
55 univariate analysis. The overall in-hospital mortality rate was 3.3% (n=2,681) with the  
56  
57  
58  
59  
60

1 *Shoda et al., Supplementary file*

2  
3  
4  
5  
6 average length of stay of 38 days. Male gender, advancing age, conservative treatment  
7  
8 and smaller hospital size were significantly associated with higher mortality. As for  
9  
10 comorbidities, patients with malignancy, lung disease, renal failure and hepatic failure at  
11  
12 admission exhibited higher mortality rates. In contrast, diabetes mellitus, cardiovascular  
13  
14 disease or cerebrovascular disease did not significantly affect the mortality of the  
15  
16 patients. The number of comorbidities at admission was positively related to the  
17  
18 mortality rate.  
19  
20  
21  
22  
23  
24  
25  
26  
27  
28

### 29 **Multivariate analysis of in-hospital mortality**

30  
31  
32 Table 3 shows the adjusted OR and 95% CI for in-hospital mortality as determined by  
33  
34 multivariate analysis. Consistent with the univariate analysis, the in-hospital mortality  
35  
36 was significantly associated with male gender (OR 2.12 compared with female gender;  
37  
38  $p < 0.001$ ), advancing age (OR 1.57 in the 70–79 years age group, 2.28 in the 80–89  
39  
40 years group and 3.51 in the  $\geq 90$  years group compared with the 60–69 years age group,  
41  
42  $p < 0.001$ ), conservative treatment (OR 4.25 compared with the surgical treatment group,  
43  
44  $p < 0.001$ ), and number of comorbidities (OR 2.50 in patients with one comorbidity and  
45  
46 3.79 in those with two or more comorbidities as compared with no comorbidity,  
47  
48  $p < 0.001$ ). There was no association with hospital size. We then stratified the patients  
49  
50  
51  
52  
53  
54  
55  
56  
57  
58  
59  
60

1 *Shoda et al., Supplementary file*

2  
3  
4  
5  
6 into the following three groups according to the number of comorbidities: no  
7  
8  
9 comorbidity (n=51,544), one comorbidity (n=22,170), and two or more comorbidities  
10  
11 (n=7,086). Regardless of the number of comorbidities, conservative treatment was  
12  
13  
14 significantly associated with higher mortality compared with surgical treatment (fig 1A).  
15  
16  
17 In addition, patients with conservative treatment exhibited higher mortality even the  
18  
19  
20 patients were stratified according to age (fig 1B).  
21  
22

23  
24 We finally analysed the effect of surgical delays on in-hospital mortality in patients  
25  
26 treated surgically. The proportion of patients with delay to surgery of 5 days or longer  
27  
28 was 53.6%, and the delay was significantly associated with a higher rate of in-hospital  
29  
30 mortality (OR 1.34; 95% CI 1.20 to 1.50), while there was no significant difference in  
31  
32 mortality among patients undergoing surgery within 4 days.  
33  
34  
35  
36  
37  
38  
39

## 40 **DISCUSSION**

41  
42  
43 Previous studies have reported that 3.6% to 6.0% of patients with hip fractures die  
44  
45 during hospitalisation,<sup>9 20</sup> and that the 1-year mortality rate is between 10.1% and  
46  
47 27.3%.<sup>12 21</sup> The reasons for the high mortality rate after hip fracture have been  
48  
49  
50 extensively studied. Frost et al. recently reported that men had a 2.4 times higher risk of  
51  
52  
53 in-hospital death compared with women, and advancing age increased the risk by 2.06  
54  
55  
56  
57  
58  
59  
60

Shoda et al., Supplementary file

1  
2  
3  
4  
5  
6 times for every 10-year increase in age.<sup>9</sup> Maggi et al. reported that 6-month mortality  
7  
8  
9 was positively associated with increasing age, comorbidity, pre-fracture functional  
10  
11  
12 disability and having surgery more than 48 hours after admission.<sup>22</sup> Hu et al. identified  
13  
14  
15 the following 12 preoperative predictors of postoperative mortality in hip fracture  
16  
17  
18 patients through systematic review: advanced age, male gender, nursing home or facility  
19  
20  
21 residence, poor preoperative walking capacity, poor activities of daily living, higher  
22  
23  
24 ASA (American Society of Anesthesiologists) grading, poor mental state, multiple  
25  
26  
27 comorbidities, dementia or cognitive impairment, diabetes, cancer and cardiac disease.<sup>10</sup>  
28

29  
30 In this study, we investigated the in-hospital mortality rate after hip fractures using  
31  
32 the Japanese DPC administrative claims database. The DPC database is equivalent in  
33  
34  
35 several ways to the Nationwide Inpatient Sample database in the United States, but there  
36  
37  
38 is an advantage of the DPC database whereby complications occurring after admission  
39  
40  
41 are clearly differentiated with comorbidities that were already present at admission.  
42

43  
44 In our study, 83% of the patients underwent surgery and 17% were treated  
45  
46 conservatively, which were similar rates to previous studies<sup>21</sup>. The proportion of  
47  
48  
49 conservative treatment was higher than that in the Western countries, which may be due  
50  
51  
52 to the insurance system in Japan, which allows patients a longer hospital stay.  
53

54  
55 Overall, 3.3% of patients died during the hospitalisation. The mortality rate was  
56  
57  
58  
59  
60

1 *Shoda et al., Supplementary file*

2  
3  
4  
5  
6 slightly lower than that in previous reports. In multivariate analysis, we found that male  
7  
8  
9 gender, advancing age and number of comorbidities were positively and independently  
10  
11  
12 associated with the mortality, which is consistent with previous studies. The size of  
13  
14  
15 hospital as determined by the number of acute beds had no significant relationship with  
16  
17  
18 in-hospital mortality in our study. This result may suggest that high risk patients are not  
19  
20  
21 necessarily treated at large hospitals. Schilling et al. reported that decreased  
22  
23  
24 hospital-wide nurse staffing levels are associated with increased in-hospital mortality  
25  
26 among patients with hip fracture.<sup>20</sup> In contrast, Browne et al. reported that hospital  
27  
28  
29 volume is not associated with decreased mortality in the treatment of hip fractures.<sup>23</sup>  
30  
31  
32 There are various scales to represent hospital quality, so more studies may be needed to  
33  
34  
35 clarify the relationship between hospital quality and hip fracture mortality.  
36  
37

38 Interestingly, conservative treatment was an independent risk factor for in-hospital  
39  
40 mortality. The analysis indicated that this did not arise because of patients with higher  
41  
42 risks being more likely to undergo conservative treatment, because patients treated  
43  
44 conservatively exhibited more than four times higher risk for mortality even after  
45  
46  
47 stratification according to the number of comorbidities or age. The exact reason for the  
48  
49  
50 higher mortality in conservatively treated patients is unclear, but the patients treated  
51  
52  
53 surgically can start rehabilitation earlier, and therefore avoid the complications caused  
54  
55  
56  
57  
58  
59  
60

1 *Shoda et al., Supplementary file*

2  
3  
4  
5  
6 by long-term bed rest such as bedsores, venous thromboembolism, atelectasis and  
7  
8  
9 hypostatic pneumonia.

10  
11 We found that surgical delays of 5 days or more were significantly associated with  
12  
13 higher rates of in-hospital mortality, which was consistent with the recent prospective  
14  
15 cohort study by Vidan et al., showing that surgical delays longer than 5 days were  
16  
17 associated with higher mortality and medical complication rates.<sup>15</sup>  
18  
19  
20  
21  
22

23 Our study has several limitations. First, this is a retrospective observational study.  
24  
25 Thus, patient allocation was non-randomised and the cohort of patients we used did not  
26  
27 constitute random sampling. Consequently, our results are potentially biased due to  
28  
29 unmeasured confounders. Second, the DPC adopting hospitals are generally of large  
30  
31 size although the DPC database covered more than 40% of all inpatient admissions in  
32  
33 Japan. Third, this database is for administrative claims, so recorded diagnoses may be  
34  
35 less well validated than in planned prospective surveys. Finally, this database includes  
36  
37 information only during the hospitalisation, and we were unable to determine the  
38  
39 condition of patients before admission or after discharge. Despite these limitations, our  
40  
41 study provides helpful information about the risk factors of in-hospital mortality for  
42  
43 treatment decision-making in patients with hip fractures.  
44  
45  
46  
47  
48  
49  
50  
51  
52  
53  
54  
55  
56  
57  
58  
59  
60

## CONCLUSION

This study has shown that male gender, advancing age, high number of comorbidities and surgical delay were associated with higher rates of in-hospital mortality in patients with hip fractures.

## Acknowledgement

**Contributors:** NS, HY, HH and ST designed the study, analysed and interpreted the data, and drafted the manuscript. YK contributed to the study design, analysis and interpretation of the data. SM interpreted the data and made significant contributions to drafts of the manuscript. All authors had full access to all data (including statistical reports and tables) in the study and take responsibility for the integrity of the data and the accuracy of the data analysis. SN, HY and ST are guarantors.

**Funding:** This study was supported in part by Grants-in-Aid for Research on Policy Planning and Evaluation from the Ministry of Health, Labour and Welfare, Japan; the Funding Program for World-Leading Innovative R&D on Science and Technology (FIRST program) from the Council for Science and Technology Policy, Japan; and a research grant from Japan Osteoporosis Foundation. The funding source was not involved in the design, conduct or interpretation of the study, or in the writing of the



1  
2  
3  
4  
5  
6  
7  
8  
9  
10  
11  
12  
13  
14  
15  
16  
17  
18  
19  
20  
21  
22  
23  
24  
25  
26  
27  
28  
29  
30  
31  
32  
33  
34  
35  
36  
37  
38  
39  
40  
41  
42  
43  
44  
45  
46  
47  
48  
49  
50  
51  
52  
53  
54  
55  
56  
57  
58  
59  
60

*Shoda et al., Supplementary file*

submitted work.

**Competing interests:** None declared.

**Ethical approval:** Not needed

For peer review only

Shoda et al., Supplementary file

## References

1. Gullberg B, Johnell O, Kanis JA. World-wide projections for hip fracture. *Osteoporosis international : a journal established as result of cooperation between the European Foundation for Osteoporosis and the National Osteoporosis Foundation of the USA* 1997;7(5):407-13.
2. Hagino H, Furukawa K, Fujiwara S, et al. Recent trends in the incidence and lifetime risk of hip fracture in Tottori, Japan. *Osteoporosis international : a journal established as result of cooperation between the European Foundation for Osteoporosis and the National Osteoporosis Foundation of the USA* 2009;20(4):543-8.
3. Hagino H, Sakamoto K, Harada A, et al. Nationwide one-decade survey of hip fractures in Japan. *Journal of orthopaedic science : official journal of the Japanese Orthopaedic Association* 2010;15(6):737-45.
4. Johnell O, Kanis JA. An estimate of the worldwide prevalence, mortality and disability associated with hip fracture. *Osteoporosis international : a journal established as result of cooperation between the European Foundation for Osteoporosis and the National Osteoporosis Foundation of the USA* 2004;15(11):897-902.
5. Orimo H, Yaegashi Y, Onoda T, et al. Hip fracture incidence in Japan: estimates of new patients in 2007 and 20-year trends. *Arch Osteoporos* 2009;4(1-2):71-77.
6. Sambrook P, Cooper C. Osteoporosis. *Lancet* 2006;367(9527):2010-8.
7. Abrahamsen B, Vestergaard P. Declining incidence of hip fractures and the extent of use of anti-osteoporotic therapy in Denmark 1997-2006. *Osteoporosis international : a journal established as result of cooperation between the European Foundation for Osteoporosis and the National Osteoporosis Foundation of the USA* 2010;21(3):373-80.
8. Leslie WD, O'Donnell S, Jean S, et al. Trends in hip fracture rates in Canada. *JAMA : the journal of the American Medical Association* 2009;302(8):883-9.
9. Frost SA, Nguyen ND, Black DA, et al. Risk factors for in-hospital post-hip fracture mortality. *Bone* 2011;49(3):553-8.
10. Hu F, Jiang C, Shen J, et al. Preoperative predictors for mortality following hip fracture surgery: A systematic review and meta-analysis. *Injury* 2011.
11. Meyer HE, Tverdal A, Falch JA, et al. Factors associated with mortality after hip fracture. *Osteoporosis international : a journal established as result of cooperation between the European Foundation for Osteoporosis and the National Osteoporosis Foundation of the USA* 2000;11(3):228-32.
12. Panula J, Pihlajamaki H, Mattila VM, et al. Mortality and cause of death in hip fracture

Shoda et al., Supplementary file

- 1  
2  
3  
4  
5 patients aged 65 or older: a population-based study. *BMC Musculoskelet Disord*  
6 2011;12:105.  
7  
8 13. Bottle A, Aylin P. Mortality associated with delay in operation after hip fracture:  
9 observational study. *BMJ* 2006;332(7547):947-51.  
10  
11 14. Gdalevich M, Cohen D, Yosef D, et al. Morbidity and mortality after hip fracture: the  
12 impact of operative delay. *Archives of orthopaedic and trauma surgery*  
13 2004;124(5):334-40.  
14  
15 15. Vidan MT, Sanchez E, Gracia Y, et al. Causes and effects of surgical delay in patients  
16 with hip fracture: a cohort study. *Annals of internal medicine* 2011;155(4):226-33.  
17  
18 16. Simunovic N, Devereaux PJ, Sprague S, et al. Effect of early surgery after hip fracture  
19 on mortality and complications: systematic review and meta-analysis. *CMAJ :  
20 Canadian Medical Association journal = journal de l'Association medicale  
21 canadienne* 2010;182(15):1609-16.  
22  
23 17. Orosz GM, Magaziner J, Hannan EL, et al. Association of timing of surgery for hip  
24 fracture and patient outcomes. *JAMA : the journal of the American Medical  
25 Association* 2004;291(14):1738-43.  
26  
27 18. Siegmeth AW, Gurusamy K, Parker MJ. Delay to surgery prolongs hospital stay in  
28 patients with fractures of the proximal femur. *The Journal of bone and joint surgery.  
29 British volume* 2005;87(8):1123-6.  
30  
31 19. Matsuda S, Ishikawa KB, Kuwabara K, et al. Development and use of the Japanese  
32 case-mix system. *Eurohealth* 2009;14(3):25-30.  
33  
34 20. Schilling P, Goulet JA, Dougherty PJ. Do Higher Hospital-wide Nurse Staffing Levels  
35 Reduce In-hospital Mortality in Elderly Patients with Hip Fractures: A Pilot Study.  
36 *Clin Orthop Relat Res* 2011.  
37  
38 21. Sakamoto K, Nakamura T, Hagino H, et al. Report on the Japanese Orthopaedic  
39 Association's 3-year project observing hip fractures at fixed-point hospitals. *Journal  
40 of orthopaedic science : official journal of the Japanese Orthopaedic Association*  
41 2006;11(2):127-34.  
42  
43 22. Maggi S, Siviero P, Wetle T, et al. A multicenter survey on profile of care for hip fracture:  
44 predictors of mortality and disability. *Osteoporosis international : a journal  
45 established as result of cooperation between the European Foundation for  
46 Osteoporosis and the National Osteoporosis Foundation of the USA*  
47 2010;21(2):223-31.  
48  
49 23. Browne JA, Pietrobon R, Olson SA. Hip fracture outcomes: does surgeon or hospital  
50 volume really matter? *The Journal of trauma* 2009;66(3):809-14.  
51  
52  
53  
54  
55  
56  
57  
58  
59  
60

1 *Shoda et al., Supplementary file*

2  
3  
4  
5  
6 **Figure legends**

7  
8  
9 **Fig 1** Odds ratios of in-hospital mortality and 95% confidence intervals in hip fracture  
10  
11 patients treated conservatively. **A.** Patients were stratified into three groups according to  
12  
13 the number of comorbidities. **B.** Patients were stratified into four groups according to  
14  
15  
16  
17  
18 age.  
19  
20  
21  
22  
23  
24  
25  
26  
27  
28  
29  
30  
31  
32  
33  
34  
35  
36  
37  
38  
39  
40  
41  
42  
43  
44  
45  
46  
47  
48  
49  
50  
51  
52  
53  
54  
55  
56  
57  
58  
59  
60

Shoda et al., Supplementary file

Table 1 Patient characteristics

|                                             | n      | (%)    |
|---------------------------------------------|--------|--------|
| <b>Gender</b>                               |        |        |
| Females                                     | 63,920 | (79.1) |
| Males                                       | 16,880 | (20.9) |
| <b>Age</b>                                  |        |        |
| 60–69                                       | 5,523  | (6.8)  |
| 70–79                                       | 18,618 | (23.0) |
| 80–89                                       | 37,362 | (46.2) |
| ≥90                                         | 19,297 | (23.9) |
| <b>Treatment</b>                            |        |        |
| Surgical                                    | 66,893 | (82.8) |
| Conservative                                | 13,907 | (17.2) |
| <b>Hospital size (number of acute beds)</b> |        |        |
| ≤199                                        | 11,243 | (13.9) |
| 200–399                                     | 32,613 | (40.4) |
| 400–599                                     | 23,125 | (28.6) |
| ≥600                                        | 12,099 | (15.0) |
| <b>Comorbidities</b>                        |        |        |
| Malignancy                                  | 4,753  | (5.7)  |
| Diabetes mellitus                           | 10,795 | (13.4) |
| Cardiovascular disease                      | 6,147  | (7.6)  |
| Cerebrovascular disease                     | 6,438  | (8.0)  |
| Lung disease                                | 5,179  | (6.4)  |
| Renal failure                               | 3,554  | (4.4)  |
| Hepatic failure                             | 646    | (0.8)  |
| <b>Number of comorbidities</b>              |        |        |
| 0                                           | 51,544 | (63.8) |
| 1                                           | 22,170 | (27.4) |
| ≥2                                          | 7,086  | (8.8)  |

Shoda et al., Supplementary file

Table 2 Risk factors for in-hospital mortality (univariate analysis)

|                                             | In-hospital mortality |        |         |
|---------------------------------------------|-----------------------|--------|---------|
|                                             | n                     | (%)    | p-value |
| <b>Total</b>                                | 2681                  | (3.3)  |         |
| <b>Gender</b>                               |                       |        |         |
| Females                                     | 1677                  | (2.6)  | <0.001  |
| Males                                       | 1004                  | (5.9)  |         |
| <b>Age</b>                                  |                       |        |         |
| 60–69                                       | 97                    | (1.8)  | <0.001  |
| 70–79                                       | 488                   | (2.6)  |         |
| 80–89                                       | 1223                  | (3.3)  |         |
| ≥90                                         | 873                   | (4.5)  |         |
| <b>Treatment</b>                            |                       |        |         |
| Surgical                                    | 1372                  | (2.1)  | <0.001  |
| Conservative                                | 1309                  | (9.4)  |         |
| <b>Hospital size (number of acute beds)</b> |                       |        |         |
| ≤199                                        | 454                   | (4.0)  | <0.001  |
| 200–399                                     | 1080                  | (3.3)  |         |
| 400–599                                     | 672                   | (2.9)  |         |
| ≥600                                        | 412                   | (3.4)  |         |
| <b>Comorbidities</b>                        |                       |        |         |
| Malignancy                                  | 669                   | (14.6) | <0.001  |
| Diabetes mellitus                           | 365                   | (3.4)  | 0.694   |
| Cardiovascular disease                      | 198                   | (3.2)  | 0.659   |
| Cerebrovascular disease                     | 215                   | (3.3)  | 0.920   |
| Lung disease                                | 516                   | (10.0) | <0.001  |
| Renal failure                               | 305                   | (8.6)  | <0.001  |
| Hepatic failure                             | 126                   | (19.5) | <0.001  |
| <b>Number of comorbidities</b>              |                       |        |         |
| 0                                           | 968                   | (1.9)  | <0.001  |
| 1                                           | 1139                  | (5.1)  |         |
| ≥2                                          | 574                   | (8.1)  |         |

Shoda et al., Supplementary file

Table 3 Risk factors for in-hospital mortality (multivariate analysis)

|                                             | Odds ratio | 95% confidence interval | p-value |
|---------------------------------------------|------------|-------------------------|---------|
| <b>Gender</b>                               |            |                         |         |
| Females                                     | reference  |                         |         |
| Males                                       | 2.12       | 1.94 to 2.31            | <0.001  |
| <b>Age</b>                                  |            |                         |         |
| 60–69                                       | reference  |                         |         |
| 70–79                                       | 1.57       | 1.25 to 1.96            | <0.001  |
| 80–89                                       | 2.28       | 1.84 to 2.82            | <0.001  |
| ≥90                                         | 3.51       | 2.83 to 4.37            | <0.001  |
| <b>Treatment</b>                            |            |                         |         |
| Surgical                                    | reference  |                         |         |
| Conservative                                | 4.25       | 3.92 to 4.61            | <0.001  |
| <b>Hospital size (number of acute beds)</b> |            |                         |         |
| ≤199                                        | reference  |                         |         |
| 200–399                                     | 0.99       | 0.88 to 1.11            | 0.814   |
| 400–599                                     | 0.88       | 0.77 to 1.00            | 0.043   |
| ≥600                                        | 0.93       | 0.81 to 1.07            | 0.304   |
| <b>Number of comorbidities</b>              |            |                         |         |
| 0                                           | reference  |                         |         |
| 1                                           | 2.50       | 2.28 to 2.74            | <0.001  |
| ≥2                                          | 3.79       | 3.38 to 4.24            | <0.001  |
